# Supplementary material for: Biosynthesis of insect sex pheromone precursors via engineered β-oxidation in yeast
Source: PubMed Central journal article supplement (PMC9435373; doi:10.1093/femsyr/foac041), 2022-08-10
Supplement: foac041_supplemental_file.pdf [file foac041_supplemental_file.pdf]

Supplementary material for the research article

**Biosynthesis of insect sex pheromone precursors via engineered  $\beta$ -oxidation in yeast**

Karolis Petkevicius<sup>1,2</sup>, Leonie Wenning<sup>2</sup>, Kanchana Rueksomtawin Kildegaard<sup>2</sup>, Christina Sinkwitz<sup>2</sup>, Rune Smedegaard<sup>2</sup>, Carina Holkenbrink<sup>2</sup>, Irina Borodina<sup>1,2,\*</sup>

<sup>1</sup>The Novo Nordisk Foundation Center for Biosustainability, Technical University of Denmark, Kemitorvet 220, 2800 Kgs. Lyngby, Denmark

<sup>2</sup>BioPhero ApS, Lersø Parkallé 42-44, 4th, 2100 Copenhagen Ø, Denmark

\*Correspondence: Irina Borodina

Email: [irbo@biosustain.dtu.dk](mailto:irbo@biosustain.dtu.dk)

Supplementary table S1. Primers used in this study

| ID       | Description                     | Sequence 5' to 3'                           |
|----------|---------------------------------|---------------------------------------------|
| PR-18928 | PrTEF1intron <-_U1_fw           | CACGCGAU AGAGACCGGGTTGG                     |
| PR-18975 | <-PrTEF1_fw                     | ACCTGCACUTTTGAATGATTCTTATAC                 |
| PR-18066 | Har_FAR_U2_fw                   | ATCTGTCAUGCCACAATGGTGGTCCTGACCTCTAAG        |
| PR-16595 | Har_FAR_codoptYL_U2_rev         | CACGCGAUCTACTCGTAGGACTTCTTCTC               |
| PR-18930 | PrTEF1intron <-_forfusion_U1_fw | ATCAGTAGCU AGAGACCGGGTTGG                   |
| PR-18214 | PrTEF1intron_USER_rv            | AGTACTGCAAAAAGUGCTG                         |
| PR-23004 | PrGPD_forfusion_U1_fw           | ATCAGTAGCUGACGCAGTAGGATGTCTCTGC             |
| PR-22213 | PrGAPHD->_U2_rev                | ATGACAGAU TGTGTATGTGTGTTAATTCAAGAATG        |
| PR-19018 | Dmd9_U1_rev                     | CGTGCGAUTTATCGAGACTTGTCC                    |
| PR-21723 | <-Lbo_PPTQ_U1_fw                | ACTTTTTGCAGTACUAACCGCAG GTGCCTCGAGCCGCTTCGG |
| PR-21724 | <-Lbo_PPTQ_U1_rev               | CGTGCGAU TTACTCCTTCTTAGCGTG                 |
| PR-23435 | Ase_POX_U1_fw                   | AGTGCAGGUGCCACA ATGCCATCTTCATCTG            |
| PR-23436 | Ase_POX_U1_rv                   | CGTGCGAUTTACAGCTTAGACTGCA                   |
| PR-21755 | Lbo31670->_U2_fw                | ATCTGTCAU GCCACA ATGACTGAGGTGACCAAGG        |
| PR-21756 | Lbo31670->_U2_rev               | CACGCGAU TTACAGCTTACCCTGCATG                |
| PR-15521 | PrExp_fw                        | CGTGCGAUAAGGAGTTTGGCGCCCGTT                 |
| PR-15522 | PrExp_rev                       | ATGACAGAUTGCTGTAGATATGTCTTGT                |
| PR-21757 | Lbo49554->_U2_fw                | ATCTGTCAU GCCACA ATGGAGTCTAAGGACTTTG        |
| PR-21758 | Lbo49554->_U2_rev               | CACGCGAUTTACAGCTTGGCGGGCAGC                 |
| PR-22827 | Yli_POX2_fw                     | AGTGCAGGUGCCACAATGAACCCC                    |
| PR-22828 | Yli_POX2_rv                     | CGTGCGAUCTATTCTCATCAAG                      |
| PR-22829 | Yli_POX3_fw                     | AGTGCAGGUGCCACAATGATCTCCC                   |
| PR-22830 | Yli_POX3_rv                     | CGTGCGAUCTATTCTCTCGTCCAG                    |

|          |                                |                                                                                                          |
|----------|--------------------------------|----------------------------------------------------------------------------------------------------------|
| PR-22833 | Yli_POX5_fw                    | AGTGCAGGUGCCACAATGAACAACAAC                                                                              |
| PR-22834 | Yli_POX5_rv                    | CGTGCGAUCTACTCGTCCAGGTC                                                                                  |
| PR-22841 | Ani_POX_fw                     | AGTGCAGGUGCCACAATGCCCAACC                                                                                |
| PR-22842 | Ani_POX_rv                     | CGTGCGAUCTACAGCTTAGACTTG                                                                                 |
| PR-22843 | Cma_POX_fw                     | AGTGCAGGUGCCACAATGGCCGCTG                                                                                |
| PR-22844 | Cma_POX_rv                     | CGTGCGAUCTACAGCTTAGACGAAG                                                                                |
| PR-22845 | Hsa_POX1-2_fw                  | AGTGCAGGUGCCACAATGAACCCCG                                                                                |
| PR-22846 | Hsa_POX1-2_rv                  | CGTGCGAUCTACAGCTTCGAAGAAG                                                                                |
| PR-22847 | Pur_POX_fw                     | AGTGCAGGUGCCACAATGACCGAGG                                                                                |
| PR-22848 | Pur_POX_rv                     | CGTGCGAUCTACAGCTTCGAAGAAG                                                                                |
| PR-22849 | Rno_POX-2_fw                   | AGTGCAGGUGCCACAATGAACCCCG                                                                                |
| PR-22850 | Rno_POX-2_rv                   | CGTGCGAUCTACAGCTTCGAAGAAG                                                                                |
| PR-10595 | PrTEF1intron_fw                | CGTGCGAUAGAGACCGGTTGG                                                                                    |
| PR-24919 | HarFAR_Per2_U2_rev             | CACGCGAUCTAAAGCTTAGACTTGGCCTGAGAAAGCTT<br>AACGGCGGCGGAGCCTCCGCCCTCGTAGGACTTCTTC                          |
| PR-23172 | IntD2_dwn_fwd                  | AGTGGCCUGACCAACCTTGTTTGG                                                                                 |
| PR-23173 | IntD2_dwn_rev                  | CACGCGAUGCATATACGATTTGACTG                                                                               |
| PR-23171 | IntD2_up_fwd                   | CGTGCGAUCGTTTCGGAATGTGTC                                                                                 |
| PR-23170 | IntD2_up_rev                   | AAGCGTTGCACGUTAAGTTGAGAGAGAACGC                                                                          |
| PR-23167 | IntE_7_up_fwd                  | CGTGCGAUGAATCTTGGTGCTCAAC                                                                                |
| PR-23166 | IntE_7_up_rev                  | AAGCGTTGCACGUGCAATCCGAAGAAGC                                                                             |
| PR-23168 | IntE_7_dwn_fwd                 | AGTGGCCUTACTCACATCAGATGGTC                                                                               |
| PR-23169 | IntE_7_dwn_rev                 | CACGCGAUGACACATGTGTCTACG                                                                                 |
| PR-22532 | IntF_5_up_fwd                  | CGTGCGAUGAAGGCTACAACAAGGG                                                                                |
| PR-22533 | IntF_5_up_rev                  | AAGCGTTGCACGUTTTTTACATCACGTGCC                                                                           |
| PR-22534 | IntF_5_down_fwd                | AGTGGCCUTGCGCTCACTCGTGATG                                                                                |
| PR-22535 | IntF_5_down_rev                | CACGCGAUCTTGTTCATAGTTTAATG                                                                               |
| PR-26919 | HarFARforhrGFP_rv              | ACCACCCTCGUAGGACTTCTTCTC                                                                                 |
| PR-26920 | hrGFPforHarFAR_fw              | ACGAGGGTGGUGTTCTGTGAGCAAGCAGATC                                                                          |
| PR-15506 | hrGFP_U2_rev                   | CACGCGAUTTACACCCACTCGTGCA<br>CACGCGAUTTAAGCTTAGACTTGGCCTGAGAAAGCTTAACGG<br>CGGCGGAGCCTCCGCCACCCACTCGTGCA |
| PR-26921 | hrGFPPer2_rv                   | CACGCGAUTTAAAGCTTAGACTTGGCCTGAGAAAGCTTAACGG<br>CGGCGGAGCCTCCGCCACCCACTCGTGCA                             |
| PR-24936 | POX3 Y.l. for TEF1intron<br>fw | ACTTTTTGCAGTACUAACCGCAGATCTCCCCAACCTC                                                                    |
| PR-26932 | YliPOX3formCherry_rv           | ACCACCTUCCTCGTCCAGCTC                                                                                    |
| PR-26926 | YliALE1forTEF1intron_fw        | ACTTTTTGCAGTACUAACCGCAGGCTTTCCATGG                                                                       |
| PR-26933 | YliALE1formCherry_rv           | ACCACCTUGGTCTTGATGG                                                                                      |
| PR-26934 | mCherryforYliPOX3_fw           | AAGGTGGUGGTTCTGTGTCTAAGGGCGAAG                                                                           |
| PR-26936 | mCherry_U2_rv                  | CACGCGAUCTACTTGTACAGCTC                                                                                  |
| PR-26935 | mCherryforYliALE1_fw           | AAGGTGGUGGTTCTGTGTCTAAGGGCGAAG                                                                           |

Supplementary table S2. Synthetic genes used in this study

| ID             | Gene                                                  | Sequence 5' to 3'                                                                                                                                                                                                                                                                                                                                                                                 |
|----------------|-------------------------------------------------------|---------------------------------------------------------------------------------------------------------------------------------------------------------------------------------------------------------------------------------------------------------------------------------------------------------------------------------------------------------------------------------------------------|
| Sequence No. 1 | Fatty acyl reductase from <i>Helicoverpa armigera</i> | ATGGTGGTCCTGACCTTAAGGAGACTAAGCCCTCCGTGGCCGAGTTCTACGCTGGCAAGTCTGTCTTCATCACCCGGCGGAACCGGTTTCTCTGGGCAAGGTCTTCATTGAGAAGCTGCTGTACTCCTGTCCGACATCGGCAACATCTACATGCTGATCCGAGAGAAGAAGGACTGTCTGTGTCGAGCGAATT AAGCACTTCTGGACGACCCCTGTTACCCGACTGAAGGAGAAGCGACCCGCGACCTGGAGAA GATCGTGTGATTCCCGGAGACATCACCGTCCCGACCTGGGTATTACCTCTGAGAACGAGAAGA TGCTGATCGAGAAGGTGTGTGTCATCATTCACTCCGCCGCTACCGTCAAGTTC AACGAGCCCTG |

|                |                                                           |                                                                                                                                                                                                                                                                                                                                                                                                                                                                                                                                                                                                                                                                                                                                                                                                                                                                                                                                                                                                                                                                                                                                                                                                                                                                                                                                                                                                                                                                                                                                                                                                                                                                                                                                                                                                                                                      |
|----------------|-----------------------------------------------------------|------------------------------------------------------------------------------------------------------------------------------------------------------------------------------------------------------------------------------------------------------------------------------------------------------------------------------------------------------------------------------------------------------------------------------------------------------------------------------------------------------------------------------------------------------------------------------------------------------------------------------------------------------------------------------------------------------------------------------------------------------------------------------------------------------------------------------------------------------------------------------------------------------------------------------------------------------------------------------------------------------------------------------------------------------------------------------------------------------------------------------------------------------------------------------------------------------------------------------------------------------------------------------------------------------------------------------------------------------------------------------------------------------------------------------------------------------------------------------------------------------------------------------------------------------------------------------------------------------------------------------------------------------------------------------------------------------------------------------------------------------------------------------------------------------------------------------------------------------|
|                |                                                           | <p>CCCACGCTGGAAGATCAACGTGGAGGGAACCCGAATGATGCTGGCTCTGTCTCGACGAATGAA<br/> GGGAATTGAGGCTTTCATCCACATTTCCACCGCTACACCAACACCAACCGAGAGGTGGTGGACG<br/> AGATCCTGTACCCTGCTCTGCTGACATTTGACCAGGTGCACCGATACGCTCAAGGACGGTATCTCT<br/> GAGGAAGAGACTGAGAAGATTCTGAACGGCCGACCCAAACACCTACACCTTCCAAAGCCAGCTGAC<br/> CGAGCACCTGGTGGCTGAGAACCAGGCTTACGTGCCACCACATCATTGTCCGACCTCCGTGGTCCG<br/> CGCTATCAAGGACGAGCCATTAAGGGATGGCTGGGTAAGTGGTACGGAGCTACCGACTGACCG<br/> TGTTACCGCTAAGGGTCTGAACCGAGTCACTACCGCCACTCTTCCAACATCGTGGACCTGATT<br/> CCCGTGGACTACGTGCCAACCTGGTCACTGCGCTGGCGTAAGTCTTCCAAAGTCCACCGAGCTG<br/> AAGGTGTACAACGTGCTCTTCCGCTGCAACCCCATCACCATTTGAAAAGCTGATGTCTATGTT<br/> CGCCGAGGACGTATCAAGCAGAAGTCTACGCTATGCCCTGCCGGTGGTACATCTTACCA<br/> AGTACAAGTGGCTGGTCTGCTGCTGACCATTTCTGTTCCAGGTCACTCCCGCTACATACCAGC<br/> TGTACCAGACCTGATCGGCAAGAACCCCGATACATTAAGCTGCAGTCTCTGGTCAACAGACCC<br/> CGATCTTCCATTGACTTCTTCACTCTCACTCTGGGTCATGAAGGCTGACCGAGTCCGAGAGCT<br/> GTTCCGCTCTGTGCCCGCTGACAAGTACCTGTTCCCTGTGACCCACCGACATCAACTGGAC<br/> CCACTACATTCAGGACTACTGCTGGGGAGTGGACACTTCTTGGAGAAGAAGTCTACGAGTAG</p>                                                                                                                                                                                                                                                                                                                                                                                                                                                                                                                                                                                                                                                                                                                                                                     |
| Sequence No. 2 | Fatty acyl desaturase from <i>Drosophila melanogaster</i> | <p>ATGGCTCCCTACTCTCGAATCTACCACCAGGACAAGTCTGCCGAGAGACTGGCGTGTCTTTCGA<br/> GGACGACGCCAGACCGTGGACTCTGACCTGACCACCGACCGATTCCAGCTGAAGCGAGCCGAGA<br/> AGCGAGACTGCCCTGGTGTGGCGAAACATCATCTGTTCCGCTGGTGCACCTGGCCGCTGTGT<br/> ACGGCTGCACTCTATCTTACCCGAGCCAAGCTGGCCACCCTCTGTTCCGCTGCCGGCTGTACA<br/> TCATCGGCATGTGGGCGTGAACGCTGGCGCCACCGACTGTGGGCTCACCGAACCTACAAGGCC<br/> AAGTGGCCCTGGACTGCTGCTGGTGTCTTCAACACCATTTGCCCTCCAGGACGCGGTGTACCAC<br/> TGGGCCGAGATCACCGAGTGCACCAAGTACTCTGAGACTGACGCTGACCTTCAACACCGTAC<br/> CCGAGGCTTCTTCTCTCACGTGGCTGGCTGTGTGCAAGAAGCACCAGCATCAAGGAAA<br/> AGGGCCGAGGCTGGACTGTCTGACCTGCGAGCTGACCCATCTGATGTTCCAGCGAAAGCAC<br/> TACTACATTTCTGATGCCCTGGCTGCTTCTGCTGCTGCCACCGTGTATCCATGGTGTACTGGAAC<br/> GAGACTCTGGCCTTCTCTGGTTCGTGGCCACCATGTTCCGATGGTGTCTCCAGCTCAACATGACC<br/> TGGCTGGTGAACCTCTGCCCTCACAAAGTTCGGCAACCGACCTTACGACAAGACTATGAACCCAC<br/> TCAGAACGCCTTCTGTCTGCCTTCACTTTCGGCGAAGGCTGGCACAACCTACCACCACGATTCCC<br/> TTGGGACTACAAGACCGCGAGTGGGGCTGCTACTCTTGAACATCACACCAGCCTTTCATCGACC<br/> TGTTCCGTAAGATCGGCTGGGCTACGACCTCAAGACCGTGGCTCCCGAGTGTCCAGCGACGA<br/> GTGCTGCGAACCGGACGGCTCTCACGAGCTGTGGGGCTGGGGGACAAAGACCTGACCGCTGA<br/> GGACGCCGAACCTCTGCTGGTGGACAAGTCTCGATAA</p>                                                                                                                                                                                                                                                                                                                                                                                                                                                                                                                                                                                                                                                        |
| Sequence No. 3 | Fatty acyl desaturase from <i>Lobesia botrana</i>         | <p>ATGGTGCCTCGAGCCGCTTCGGAGGAGACCGACCTTAAGGAGGCTACCCAGCTTGGCCCCGAAA<br/> GTACGAGATCGTGTACACTAACGTGATCTACTTACCTATTGGCATATCGCCGGACTGTACGGTC<br/> TGTACCTGTGTTTTACTCCGCTAAATGGGAGACCATCGTGTTCGCTTGGGCTTGGTATGTGCTC<br/> GGAGAGCTGGGAGTGATTGCCGGCTCATAGATTGTGGGCCACCGAACCTACAAGGCAAAGAT<br/> GCCCCGAGATCATCTGATGCTGTTAATTGTATCGGTTTTAGAACACCGCTACCGATTGGG<br/> TTGAGATCACCGAGTGCATCAAGCACTCTGACACCGACCGCCAGCCCATAACTCTCAGCGA<br/> GGCTTCTTTCTCTCACGTGGGCTGGCTGCTGACCCGAAAGCATCGGCTGGTGAAGGAGAAGGG<br/> AGAAGCTGTTGACATGACTGATATCTACTTAACCTGTTTTAAGATCCAGAAGAAGTACTCTC<br/> TCCCCCTGATCGGCACTTGTGCTTGGCTGCCCCACCTGCTGCCGCTTACTCTTGGGAGGAGG<br/> CCGTCGGCACCGCTTGAACATTAACCTGCTGCGATACTGTCTAACCTGAACGGAACCTTCTG<br/> ACTAACTCCGCCCTCACAAAGTTGGCTCTAAGCCCTATGACAAGACCTTCTCCACCCAGAAC<br/> TTGCTGGTGTCTTTCATGACTCTGGGAGAAGGATTTCAATAATACCACCAGTCTTCTCGTGGGA<br/> CTACCGAGCTGCTGAGCTTGGCAACCTACCTGAACATGACCATCTCTTATCTTCTGCTTCTG<br/> CTCTTATTGGATGGGCTACGACCTGAAGACCGTTCTGAGGATGTTATTAAGGAGGATGGCC<br/> CGAAGTGGAGATGGTACTAACCTGTGGGGTGGGGAGACAAGGACATGACCAAGGAGGACGTGG<br/> TGGACACCGAGATACGATTCCACGCTAAGAAGGAGTAA</p>                                                                                                                                                                                                                                                                                                                                                                                                                                                                                                                                                                                                                                                                                                                                      |
| Sequence No. 4 | Peroxisomal oxidase from <i>Agrotis segetum</i>           | <p>ATGCCATCTTTCATCTGCATCATCACTCTCAGGCCATCATCCGATCTAACGTCGAGCGAGTGGCC<br/> GTGATCCTGAACATCAACATGGGCAAGGTGAACGAGGACCTGGTGGGAGAGCCAGGCAAGTGCAC<br/> CTTCAACATCGAGGAAGTACCTACTTCTGGACGGCGCAAGGACAAGACCTCGAGCGAAAGG<br/> AAACCGAGCGAGCTATGCTGACCAAGCGAGAGGAAGTGTTCGGCGGCTGCCGACGAGTACCTG<br/> TCTACAAGGAAAAGTACGAGAAGTCTATGCGAAAGGCCGTGATTCTGTTCGGCATCTCGGAAA<br/> GATCCAGAAGGACAACACCGACTGACCAACTACCGAAACCTGTGCTGTCGGCTGTCTGTCTG<br/> TGTCTATCTCTCAGGACGGCTCTCCCTTCCGCTGCACTACATGTTGATGCCCGTGTGTGTGT<br/> CTCAGGCCGACGAGAAGCAGCAAGAGAAGTGGCTGAAGCGAGCCATGAACTGCGAGATCATCGGC<br/> TCTTACGCCAGACCGAGCTGGCCACGGCACCTTTCATCCGAGGACTCGAGACTACCGCCACTTAC<br/> GACCCGCCACTCAAGAGTTCGTGCTGCACTCTCCGCTCTGCTCTTACAAGTGGTGGCCCGGT<br/> GGCCTGGGCAACACCTGAACTACTGCACTGATCGATCGCCAGCTGACTCTAAGGGCGTGTGCCA<br/> CGGCATCCACTCGTTCATCGTGCAGGTCCGAGATGAGGACACCCACATGCCTCTGCCTGGCATCA<br/> AGGTGGGCGAGATCGGCGTCAAGATGGGCTGAACTCTGTGAACAACGGCTTCTGGGCTTGGAG<br/> AACGTGCGAATTCCCGAGTGAACATGCTGATGAAGCACGCCAAGATTCTCGAGGACGGCACCTA<br/> CGTGAAGTCTAAGAACAACAAGTGTACTACGGCGCATGGTGTTCGTGCGAGTGGTGTGTGT<br/> TCGACTCTGTAACCTACCTGGCCAGGCCATCACTATCGGAGCCGATCTCTGTTGCGGACGA<br/> CAGTCTCAGTGAAGGCCGGGAGCCCGAGGACAGATCTGGACTACGTGACCCAGCAGCACAA<br/> GATTCTGCCCGCATTGGCGCTGTACGCCATGAAGATGAACGCTGGCGACTGTGGGACACT<br/> TTAACCTGATCAACGGCCAGCTGCACCAGGGCAACATGGAACGACTGGGCGAGTGCACGCCCTG<br/> GCCTGTGCCTGAAGGCCATCTCTACCACCGACCGCTATGTTCACTCTCTGTGGCAGCTGCGC<br/> TGTGGCGGCCACGGCTACATGACCTTCTAACCTGCCTCTACCTACGCTCTGACCTCTGCCTCT<br/> TGCACCTACGAGGGCGACAACACCGTTCTGCTGCTGACAGCCGCTCGATTCTGCTCAAGACCTG<br/> CGACAGATTGACACCATCTCTGACTCGAACCGTGGCTACCTCAAGACCGTGTCTGCTCCCGG<br/> CTTCTGACCGATGGGATCTCTGTCGAGGGCATATTCCGAGCTTCCAGACCGTGGCTATGA<br/> AGAAGATCTTCTTGGCTGGACATGACCTCCAAGGTGATGCTGCTCAAGAGGAC<br/> GCCTGGAACGCCATCTCATCCAGTGGTGTCTGCCCGGAGTCTCACTCTCGAGGACCGTGTATC</p> |

|                |                                                                 |                                                                                                                                                                                                                                                                                                                                                                                                                                                                                                                                                                                                                                                                                                                                                                                                                                                                                                                                                                                                                                                                                                                                                                                                                                                                                                                                                                                                                                                                                                                                                                                                                                                                                                                                                                                                                                                                                                                                                                                                                                                                                                                                                                                                                                                    |
|----------------|-----------------------------------------------------------------|----------------------------------------------------------------------------------------------------------------------------------------------------------------------------------------------------------------------------------------------------------------------------------------------------------------------------------------------------------------------------------------------------------------------------------------------------------------------------------------------------------------------------------------------------------------------------------------------------------------------------------------------------------------------------------------------------------------------------------------------------------------------------------------------------------------------------------------------------------------------------------------------------------------------------------------------------------------------------------------------------------------------------------------------------------------------------------------------------------------------------------------------------------------------------------------------------------------------------------------------------------------------------------------------------------------------------------------------------------------------------------------------------------------------------------------------------------------------------------------------------------------------------------------------------------------------------------------------------------------------------------------------------------------------------------------------------------------------------------------------------------------------------------------------------------------------------------------------------------------------------------------------------------------------------------------------------------------------------------------------------------------------------------------------------------------------------------------------------------------------------------------------------------------------------------------------------------------------------------------------------|
|                |                                                                 | TCTACCTTCTACGAGGACATGTCTAAGGCCATGCGATCTATGACCGCTCCTTGCGCTAAGGTGAT<br>GGGCCAGCTGGTTCGAGCTGTAGCCTGTGACTGGACTCTCGAGCGACTGGGAGACATGCTGCAGT<br>ACACCTCTATCTCCACACCCGACCTGGTGGACCTGCGATCTTGGTACGAGGAACCTCCCGAAAG<br>ATTCCAGCCAAACACCATCGCCTGGTGGACGCTTTCGACATCATCGACGAGCTCCAGCTTACC<br>CTGGGCGCTACGACGGCCGAGTGTACGAGCGACTCATGGAAGAGGCCCTGAAGTCTCCCTGAA<br>CGCTGAGCCCGTGAACAGTCTTTCCACAAGTACCTGAAGCCTTTCATGCAGTCTAAGCTGTAA                                                                                                                                                                                                                                                                                                                                                                                                                                                                                                                                                                                                                                                                                                                                                                                                                                                                                                                                                                                                                                                                                                                                                                                                                                                                                                                                                                                                                                                                                                                                                                                                                                                                                                                                                                                                                                |
| Sequence No. 5 | Peroxisomal<br>oxidase 31760<br>from <i>Lobesia<br/>botrana</i> | ATGACTGAGGTGACCAAGGTGAACCCGACCTCCAGCGAGAACGAGACAACCTGTACATTCACCT<br>TACCGAGCTGACTAACCTGATCGACGGCGGTGTGCAGAAGACCGAGGAGCGACGGAAGCGAGAG<br>AGATGGTGTGAAAAGAAGGTATCCACCTGGACGAGGTTCCCTCAGATACCTGTCCCAACAGGAG<br>AAGTACGAGCTCGTGTGAAGAAGGCATGCTACCTGTTCAAGATGATCCGACGACTGCAGGAGGA<br>AGAGAACACTGGAATGGAGAATTACCAGGAGGTGCTGGGCGGATCCCTGGGATCCCGTATCCTGC<br>GAGACGGTCCCTCTCACCTGCACTTACGTGATGTTTACCTTACCATCATGGGCCAGGCTACGG<br>TTGAGCAGCAAGTGTGGTGGATCGGCCGAGCCTTCAATTGGGATATTATCGGAACCTACGCCAG<br>ACTGAGCTTGGTTCACGGAACCTTTCATTCGAGGACTGGAAACCACCGCCTTACGATCCCTCTAC<br>AAAGGAGTTCGTCTGCACTCCCTTCTGACTTCTACAGTGGTGGCCGGAGGCGCTTGGCTC<br>ACACGGCAATTACTGTATCGTGGTGGCTCAACTTACACACAAGGCAAGTGCATGGCATTAC<br>CCCTTATCGTCCAGTACGAGACGAAGAGACCCACATGCCCTGCCCGCATCAAGTGGGCGA<br>AATCGGCTAAACTGGGAATGAACGGCACCAACAACCGGCTTCCCTGGATTCGATAAGTGGAA<br>TCCCCGAGAGCACATGCTGATGAAGAACGCCAAGGTTCTCGAGGACGGTACCTATGTGCGAGCC<br>CCCAGCAGTAAGCTGACATACGGTACTATGATGTTTGTGCGAGTGTGCTGGTGAACGACGCTGTG<br>CTCGTATATGGCAAAGGCCGTTACCATCGCTACTAGATACTGTGTGGCAGACACGACTCTCAGC<br>CTAAGCCGACGAGCCCGAGCCCAATCCTGGAGTACGTGACTCAACAGGACAAGCTTGCATC<br>GGCATTGCAACCGTGCACGCCCTTCGACTATCCGCTCTTGGCTGTGGAACATGTACAACAACGT<br>GACAGCCGAGCTGGACCGCGGACTTAGAGCGACTTCCAGAAGTGCAGCTGTGTCTTGTGTGTC<br>TGAAGGCGCTTCGACTGCTGATGCCTCTGAATGCGTTCGAGCGATGCGGACTTGTGTGGAGGC<br>CACGGATACATGTTGTCTTAACTTCCCTGTGATGTACGGCATGGTACCGCGCTTGTACTTA<br>CGAAGCGGAGAACACCGTGTACCTGCACCTGCAGACCGCCGCTATCTGGTCAAGGCCCTGGCAGCAG<br>CCCAGGTTGGCAACCCCTGACGCCACTGTTGCCATCATCGGATCTATTGGCCCGGACGACGA<br>AGCCACCTTGGGATAACACCGTGGAGGGCATTATCCTGGGCTTCCAGCGCGTGGCTGCCGGTAA<br>GATTGCCAGTGTGTGCTAATATCGAAAAACGACAGCGAACCAGGATGTCTTACGAGGATGCTT<br>GGAACATGACCTCAGTGCAGCTTGTGTCTGCTAGCGAGGCCACTTGCAGCTTTCATCCTCCGG<br>ACCTACTTCGAGGAGACCGAAAACCAATCGGTTCCGCTCTTCCGCTCTGCGAGCAGTGTGCT<br>GCAACTGGTCGATTGTACGTTGTGTTTGGGCTCTGCAGCGTGTGGAGACCTTCTGAGATTCA<br>CCTCTATCTGAGCGAGACATCGAGCAGCTTCACTTGGTACGAGGATCTTCTGATCAAGCTG<br>CGAGTCAACGCTGTGCGACTGGTCCGCTTTCGACATCCGAGACGAGATCTGAACTCTGCTCT<br>CGGAGCTACGACGGCGAGCTTACGAGCGGCTTATGGATGAAGCCTTAACTTCCCTGAAACG<br>CTGAACCTGTGAACAGTCTTTCCATAAGTATCTGAAGCCTTTCATGCAGGGTAAAGCTGTAA                                                                                             |
| Sequence No. 6 | Peroxisomal<br>oxidase 49554<br>from <i>Lobesia<br/>botrana</i> | ATGGAGTCTAAGGACTTTCGACCTGTGTCCGATGCTGAGTTGAAAGACTACTTCCCGACCTCC<br>TTCTGGTCTCTGGATAAGTTCGAAAAGAAGGCCACCTTCGACTGGAGACGAATGAAGTAGTGT<br>ACGACTCTAAGCAGTCTATTGAGACCAAGGATAAGGTGTGGAAGTTCATGCTTGTCTACCCTCTG<br>TTCAAGCACTCTGTCCGCCACCCACCTGGATGAGCAGCGACAGATTGCTACCAACAGCTATGTA<br>TCTGTGCATAACGCTGACCTGGTCCCTTGGAGGAAATCGTATGCATCCCGACTCTTTCAGTCT<br>GTTGACTGAGGCCATTTTCATGTTGACTCTTCGGTGGCCGTTAAGCTGTCTTTCACCTCCGAA<br>TGTTCAACAACAATTCGCGGATCGGGCAGACAGCATCACTACCCTTGATTGAGGACTGCGAC<br>AACGGCAAGATCGGCGGATGCTTCGCCCTGACTGAGATCGCCACCGACTAATGCTTAAGGGCAT<br>GCGAACCACCGCAACCTACGACGTGGAGGGCCGATGTTTCGTCATGCACACCCCGACTTGAAG<br>CTGCCAAGTGTGGGTTGGCTCCCTGGTAAGTGTGCTACCCAGCCATTGTCTACGCCATGCTG<br>ATCTCTAAGGGCAAAAACCATGGTCTTCACTTCTCGTGGTGCCTACCGAGATCCTAAGACACT<br>CCGACCTTTGACGGCTGACTGTGCGAGACATCGCGGAGAAGATCGGACTGAACCGGATGGACA<br>ACGGTTTCTGTATGTTCAACAAGTACCGACTGCCCAAGGAGGCGCTCTCGACAAGCTGGGTGA<br>GTTGACGAAAACGGGACTACAAGACTCCTTTCAGAGATCCTTCAAAGCGGTTCCGTGCTTCCCT<br>GGCATTCTGTGTGGCGCCGAGTGCACATTACCTTATCTTACCAACTACCTCAGAAGGCTG<br>TGGTGTATCGTGTGGGATACTTCCGCTGGCCGACAGTTTGGCCCGGAGAACCGCGTCCGAGG<br>ACTCCTGTCTTGTGATACCAAGCAACAGCAGATTGACTTCTGCCCTACTCTGCGCGTACTTTCGCC<br>ATGCGAGTGTCTGTAACCTGGTTCGGCAAGTGCACGTGCAGATGACCATCGATAACCTGGTTGG<br>TGCCGACGAGCAGGCTGCGGCCGAGGTATCGAGATGCATGCCCTGTCTTCCGCCGTGAAGCCG<br>TGTGCGGTTGGACCGCCGAGACGGACTGCAGAATGTAGAGAATGTTGCGGTGGTATGGATAC<br>CTCCGAGCCTCCGCATTGGCGACTGCGAAAACGACAACGACGCAAACTGACCTACGAGGGCGA<br>GAACTCTATGCTCCTCCAGCAGACTTCTAACTGGCTGTGGCGCTTGGGCTAGACGACGACAGC<br>CCGGTTTCGCGGACACACCTTTCGGATCTATCCAATTCCTGGATGGCGCTCAGGCCCTGCTGGACG<br>AGTCTTGTCACTGGAACCTCCGCTGAAGAGATCGTGCAGCCTTCCAACGTCGTCCACATGTACAAG<br>TGGCTAACCACTACATGCTCAAGCTCACCGCTGATAAAGTGTCCAGCTTCGATCTCGAGGTTCT<br>GTCTAACTACGAGTTCGAAAACGACTTCGAGTCTTACAACGCTGTGACTTGTCTGTGGTGTATG<br>GAGAGCACTTTATTGTGAATCACTTCTACAAGACTGCACTGCAGTTCAGGACGCGCCCTGTAGA<br>GCTGTCTGCTGAAGCTGGTGGCCCTGTACGGAGCCTTCTTCTCGAGAAGCACATGGCTACCCT<br>TTATATCGGAGGATTCTTTACCAAGCAGCAGGACTGCTCCTGCGGGAAGGAGTTCTCTCTCTCT<br>GCAGCGCCCTGTACCCAGGCCGTGTGCTGGCCGACACCTCGTCCCTGATTTGGTGTCTGA<br>ACTCTGTGCTGGGATGCGCTGACGGCGAGGCGTACAACATATCCAGGATCTATTGACTTAC<br>CCTGGCTCGATGACCCGCCGTGAGTGGTGGCGAGATGTTGCCACTGGGAGACTTACGTGCCCGC<br>CAAGCTGTAA |
| Sequence No. 7 | Peroxisomal<br>oxidase from<br><i>Aspergillus<br/>nidulans</i>  | ATGCCAACCCCTCCGCTGCCTGGGTGCAAGCTCTGAAGCCCGCTTCGCCCGAGGCGACCGAGCTG<br>CTGACCCAAGAGCGAGCCAGTCTAACATCGACGTGGACACCTGGGCGACTGTGCACACCAA<br>GGAAGCCCTGAAGAAGCAGGACGAGATCCTGTCTGTGCTGAAGTCTGAGAAGGTTCCGACAAG<br>TCTCGAAACCAGTGTGGGCCAACCAGAAAGATCCAGCTGCCCTGGCTCGAGGCAAGCGACT                                                                                                                                                                                                                                                                                                                                                                                                                                                                                                                                                                                                                                                                                                                                                                                                                                                                                                                                                                                                                                                                                                                                                                                                                                                                                                                                                                                                                                                                                                                                                                                                                                                                                                                                                                                                                                                                                                                                                                             |

|                |                                                  |                                                                                                                                                                                                                                                                                                                                                                                                                                                                                                                                                                                                                                                                                                                                                                                                                                                                                                                                                                                                                                                                                                                                                                                                                                                                                                                                                                                                                                                                                                                                                                                                                                                                                                                                                                                                                                                                                                                                                                                                                                                                                                                                                                        |
|----------------|--------------------------------------------------|------------------------------------------------------------------------------------------------------------------------------------------------------------------------------------------------------------------------------------------------------------------------------------------------------------------------------------------------------------------------------------------------------------------------------------------------------------------------------------------------------------------------------------------------------------------------------------------------------------------------------------------------------------------------------------------------------------------------------------------------------------------------------------------------------------------------------------------------------------------------------------------------------------------------------------------------------------------------------------------------------------------------------------------------------------------------------------------------------------------------------------------------------------------------------------------------------------------------------------------------------------------------------------------------------------------------------------------------------------------------------------------------------------------------------------------------------------------------------------------------------------------------------------------------------------------------------------------------------------------------------------------------------------------------------------------------------------------------------------------------------------------------------------------------------------------------------------------------------------------------------------------------------------------------------------------------------------------------------------------------------------------------------------------------------------------------------------------------------------------------------------------------------------------------|
|                |                                                  | <p>GCAGCAGCTGAAGAAGGCCACAACCTGGTCTGACGAGGACGTCCACGTGGCCAACGACCTGGTGT<br/> CTGAGCCACTCCTTACGGCCTGCACGCCTCTATGTTTCTGGTGACCTCGGAGAGCAGGGCACCC<br/> CTGAGCAGCACAAGCTGTTCTACGAACGAGCCGAAACTACGAGATCATCGGCTGCTACCCCCAG<br/> ACCGAGCTTGGCCACGCTCTAACGTGCGAGGACTCGAGACTACCCGCACTTGGGACCTCTGAC<br/> CCAGACCTTCATCATTCACTCTCCCACTCTGACCGCCTCTAAGTGGTGGATCGGCTCTCTGGGACG<br/> AACCGCCAACACGCGGTGGTATGGCCAGCTGTACATCGGCGGAAGAATACGACCCCATC<br/> CTTTCGTGGTGCAGATCCGAGACATGGAAACCCACCAGCCTCTCGAGAACGTGTACGTGGGCGAC<br/> ATCGGCCCAAGTTCGGCTACAACACCATGGACAACGGCTTCTGTGTTCAACAAGCTGAAGAT<br/> TCCCCACGTGAACATGCTGGCCGATTCGCCAGGTGGACAAGGCCACCAACAAGTACATTTCGAC<br/> CCGCTTCTCCCTCTGTATGTACGGCACATGACCTGGGTGCGATCCAACATCGTGTGCAGGCTG<br/> GCGCGCTGCTCGCCGAGGCGTGACATTGCCGTGCGATACTGCGCGGTGCGACGACAGTTCAG<br/> GACCGAGATGCCAAGGCCAACGCCAAGAGAACCAGGTGCTGAACATAAGATGGTCCAGATTTCG<br/> ACTGCTGCCCTGCTGGCCGCAATGTACGCCCTGCACCTTACCCGCGAGGCATGATGCGACTGTA<br/> CGAAGAAAACCAAGAACGAATGAAGGCTGCCGCTCAGGCCGACCAAGAGAAGCGAGGCGCTGGCC<br/> CCGAGCAGCTGCGAGCCGATCTGACCTGCTGGTACCTGACGCTACCTCTTTCGCGCCTGAAG<br/> GCCCTGGCCTTACCACCGTGGCGAGGCGCTCGAGGTGTGCCGACGAGCCTGTGGCGGCCACGG<br/> ATACTTAATACTCTGGCATCGACCTGGTACGCCGACTACCTGCCTACTCTGACCTGGGAGG<br/> GCGACAATACTGCTGACTACCGCTTTCGCCGATACCTGCTGCTGCCGAGCCGCTGCTG<br/> GCCGCAAGGGCACGCCAACGACACCTCTCGAATCTGCAGGCTACCTCGCTGACGAGACAA<br/> GGCGCCTCTTCGACATCTGGGCAACGACGCCGACATTGTGGCCGCTTCGCTGGCGAACCCG<br/> TCACCTGACCTTCGAGACTTGAAGTACCGAGATGTGAGAAGCGATCTTGAACCTCTGCTGA<br/> TCAACTTCTGGGACTGTCTACCGCTCTGTCTCAGTACCTGGTGGTGAAGAATCTACGAGGCG<br/> GTGAACCTCTCCGAGATCCGATCTTCTCTGGACAAGGACACTGCTTCTACCTGCGATCTCTGTT<br/> CGACTGCACGCTCTGCACACCCTGGACCGAGAGGCTCCGAGTCTTCTTCTTCGCCCGCTGACC<br/> GTGCGACAGATCGGACTGACCCAGACCTCTGAGGTGCCAAGCTGCTGGACGAGATTTCGACCCCA<br/> CGCGTCCGACTGGTGGACTTGAAGATCCCCGACTGGCAGCTGGACTCTGCCCTGGCCGCTATC<br/> TGACGGGACGCTGTACCCGACCTGTTCAAGCGAGCCTCTATGCAGAACCCTGCAACGACCTCG<br/> TGTTGACCCCTATCTTGAACGAGAACGCTCTGAAGAACGCCGTGAGATCAAGTCTAAGCTG<br/> TAG</p>                                                                                                                                                        |
| Sequence No. 8 | Peroxisomal oxidase from <i>Cucurbita maxima</i> | <p>ATGGCCGCTGGCAAGGCCAAGGCTAAGATCGAGGTGGACATGGGATCTCTGTCTGTACATGCG<br/> AGGCAAGCACCGAGAGATCCAAGAGCGAGTGTTCGAGTACTTCAACTCTCGACCCGAGCTGCAGA<br/> CCCCTGTGGGATCTCTATGGCCGACCACCGAGAGCTGTGCATGAAGCAGCTGGTCCGCTGGT<br/> CGAGAGGCCGATTCGACCTTCGATTCTGTAACGAGGACCCGCAAGTACTTCGCCATCAT<br/> GGAAGCGTGGGCTCTGTGGAGGTGTCTCTGGCCATCAAGATGGGCGTGCAGTCTCTGTGGG<br/> GCGGCTCTGTGATCAACTGGGCACCAAGAAGCACCAGGACCGATTCTTCGACGGATCGACAAC<br/> GTGGACTACCCCGCTGCTTCGCCATGACTGAGCTGCACACGGCTCTAACCTGCAAGCCCTGCA<br/> GACCACCGCACTTCGACCCCATACCGACGAGTTCATCATCAACACCCCTAACGACGGCGCAT<br/> CAAGTGGTGGATCGGCAACGCCGCGTCCACGGCAAGTTCGCCACCGTGTTCGCCAAGCTGGTGC<br/> TGCCCACTCAGACTCTCGAAAGACCGCCGACATGGGAGTGCACGCTTCATCTGTCGCCATCCGAG<br/> ATCTGAAGTCTCACAAGACCTGCCTGGCATCGAGATCCACGACTCGAGGACCAAGTGGGCTG<br/> AACGGCGTGGACAACGGCGCCTGCGATTCCGATCTGTGCGAATTCCCGAGACAACCTGTGAA<br/> CCGATTCGGCGAGGTGTCTCGAGATGGCAAGTACAAGTCTCTGCCCCTATCAACAAGCGAT<br/> TCGCCGCACTCTGGGCGAGCTGGTGGCGGCGAGTCCGACTGGCCTACTCTTCGCTCTGTGTC<br/> TGAAGATCGCTCTACTATCGCCATCCGATACTCCCTGCTGGACAGCAGTTCGGCCCTCCTAAGC<br/> AGCCCGAGGTGCCATCTGGACTACCAAGTCTCAGCAGCACAAGGTTCAGCCCATGCTGGCCTCT<br/> ACCTACGCTTCCACTTCTTACCATGCAGCTCGTCGAGAAGTACGCCAGATGAAGAAGACCCA<br/> CGACGAGAACTGGTGGGCGAGCTGCACGCCCTGTCTGCCGCGCTGAAGGCTACCTGACCTCTT<br/> ACACCGCAAGTCTCTGTCTACCTGCCGAGAGGCTGTGGCGGCCACGGATACGCCGTGGTCAAC<br/> CGATTTGGCACCTCGGAAACGACACGACATCTTCCAGACCTTCGAGGCGACAACACCTGTCT<br/> GCTCCAGCAGGTTCGCCGCTACCTGCTCAAGCAGTACCAAGAGAAGTTCGAAGCGCACCTGG<br/> CCGTGACCTGGAATACCTGCGAGAATCTATGAACACCTACCTCTCGCAGCCCAACCTGTGACC<br/> GCTCGATGGGAGTCTGCCGACCATCTGCGAGATCCCAAGTTCAGCTGGAGCCTTTCAGTACCG<br/> AACCTCTGACTGCTGCAGTCTGTGGCCGTGGACTGGAAAGCACCAAGAACCTGGGATCTT<br/> TCGGCGCTGGAACCGATCCCTGAACCATCTGCTGACCTGGCTGAGTCTCAGAGTCTGTG<br/> ATTCTGGCCAGTTCATCGAGTCCGTGCGAGATGTCCCAACGCTAACACCCAGGCTACCTGAA<br/> GCTGGTGTGCGACCTGTACGCTCTGGACCGAATCTGGAACGACATCGGCACCTACCGAAACGTCG<br/> ACTACGTGGCTCCCAACAAGGCAAAGGCCATCCACAAGCTCACCGAGTACCTGTGCTCCAGGTG<br/> CGAAACATTGCCAAGAGCTGGTGGACGCTTCGACCTGCCTGACCAAGTACCTGAGCCCTAT<br/> TGCCATGAAGTCTAACGCCTACTCTCAGTACACCCAGTACATCGGCTTCGACGAGATTACCTCTG<br/> TGGGATCTTCGTCTAAGCTGTAG</p> |
| Sequence No. 9 | Peroxisomal oxidase from <i>Homo sapiens</i>     | <p>ATGAACCCGACCTGCGACGAGAGGACTCTGCCTCTTCAACCCCGAGCTGCTGACCCACATC<br/> CTGGACGGCTCTCCGAAAAGACCCGACGACGAGAAATCGAGAATGATCTGAAACGACCC<br/> CGACTTCCAGCAGGAGACTGAACTTCTGACCCGATCTCAGCATACGAGTGGCGCTGGGAA<br/> AGTCTGCCATCATGGTGAAGAAGATGCGAGAGTTCGGAATCGCTGACCCCGACGAGATCATGTGG<br/> TTCAAGAACTTCGTGCACCGAGGACACCCGAGCCTCTGGACCTGCACCTGGGCATGTTTCTGCC<br/> CACTCTGCTGCACAGGCAACCGCCGAGCAGCAAGAGCGATTCTTCATGCCCCGCTGGAACCTGGA<br/> GATCATCGGCACCTACGCTCAGACCGAGATGGGCCACGGCACCCCTCCGAGGACTCGAGACTA<br/> CCGCCACCTACGATCCCGAGACTCAAGAGTTCATCTGAACTCTCAAGTCTATCAAGT<br/> GGTGGCCCGGTGGACTGGCAAGACCTTAACCACGCCATCGTGTGGCCAGCTGATCACCAG<br/> GGCAAGTGTACGGCCTGCACGCCCTCATCTGCCCATCCGAGAGATCGGAACCCACAAGCTCT<br/> GCCTGGCATCACCGTGGGCGACATCGGCCCAAGTTCGGCTACGACGAGATTGACAACCGCTACC<br/> TGAAGATGGACAACCAGGAATTCCTCGAGAGAACATGCTGATGAAGTACGCCAGGTGAAGCC<br/> GACGGAACCTACGTGAAGCCCTGTCTAACAAAGCTGACCTACGGAACCTGGTGTTCGTGCGATC<br/> TTTCTGGTGGCGAGGCGCTCGAGCCCTGTCCAAGGCTGCACCATGCCATCCGATACTCTGC</p>                                                                                                                                                                                                                                                                                                                                                                                                                                                                                                                                                                                                                                                                                                                                                                                                                                                                                                                                                                                                                                                                                                                                                                               |

|                            |                                                                                  |                                                                                                                                                                                                                                                                                                                                                                                                                                                                                                                                                                                                                                                                                                                                                                                                                                                                                                                                                                                                                                                                                                                                                                                                                                                                                                                                                                                                                                                                                                                                                                                                                                                                                                                                                                                                                                                                                                                                                                                                                                                                                                                                                                                                                                                                                                                                                               |
|----------------------------|----------------------------------------------------------------------------------|---------------------------------------------------------------------------------------------------------------------------------------------------------------------------------------------------------------------------------------------------------------------------------------------------------------------------------------------------------------------------------------------------------------------------------------------------------------------------------------------------------------------------------------------------------------------------------------------------------------------------------------------------------------------------------------------------------------------------------------------------------------------------------------------------------------------------------------------------------------------------------------------------------------------------------------------------------------------------------------------------------------------------------------------------------------------------------------------------------------------------------------------------------------------------------------------------------------------------------------------------------------------------------------------------------------------------------------------------------------------------------------------------------------------------------------------------------------------------------------------------------------------------------------------------------------------------------------------------------------------------------------------------------------------------------------------------------------------------------------------------------------------------------------------------------------------------------------------------------------------------------------------------------------------------------------------------------------------------------------------------------------------------------------------------------------------------------------------------------------------------------------------------------------------------------------------------------------------------------------------------------------------------------------------------------------------------------------------------------------|
|                            |                                                                                  | <p>CGTGGACACCAGTCTGAGATCAAGCCGGGAGCCTGAGCCTCAGATCCTGGACTTTCAGACCC<br/> AGCAGTACAAGCTGTCCCTCTGCTGGCCACCGCTTACGCCTTCCAGTTCGTGGGCGCCTACATGA<br/> AGGAAACCTACCATCGAATCAACGAAGGCATCGGCCAGGGGACCTGTCTGAGTGCAGGAACTG<br/> CACGCCCTGACCGCCGACTGAAGGCTTTCACCTTGGACCGCCACCCGGATCGAGCCCTGC<br/> CGAATGGCCTGTGGCGGCCACGGCTACTCTCACTGCTCTGGACTGCCAACATCTACGTGAACCTC<br/> ACCCCTTCGTGTACCTTCGAGGGCGAGAACACCGTGTATGCTGCAGACCCTCGATTCCCTCAT<br/> GAAGTCTTACGACCAGGTGCACTCTGGCAAGCTGGTGTGGCGCATGGTGTCTTACCTGAACGATC<br/> TGCCCTCTAGCGAATTCAGCCTCAGCAGGTTGCCGTGTGGCCACCATGGTGCACATCAACTCTC<br/> CCGAGTCTCTGACCGAGGCTACAAGCTGCGAGCTGCTGACTGGTGCAGATCGCCGCAAGAAC<br/> CTGCAGAAGGAAGTCAATCCACCGAAAGTCTAAGGAAGTGGCTTGAACCTGACCTCTGTGGACCT<br/> GGTGCAGCTTCTGAGGCCACTGCCACTACGTGGTGAAGCTTCTCTGAGAAGCTGCTGA<br/> AGATCCAGGACAAGGCCATCCAGGCCGTGCTGCGATCTGTGCCTGCTACTCTCTGTACGGC<br/> ATCTCTCAGAACCGCCGACTTCTGACAGGCTTATCATGACTGAGCCCAAGATTAACCCAGGT<br/> CAACCAGCGAGTGAAGGAAGTCTCACCTGATCCGATCTGACGCCGTGGCTCTGGTGGACGCCCT<br/> TCGACTTTCAGGACGTGACCTGGGCTCTGTGCTGGGCCGATACGACGGCAACGTGTACGAGAAC<br/> CTGTTGAGTGGGCCAAGAAGTCCGCCCTGAACAAGGCCGAGGTGCACGAGTCTTACAAGCACCT<br/> GAAGTCTCTGCAGTCTAAGCTGGACCAGATTACTCTGTGGGATCTTCTCGAAGCTGTAG</p>                                                                                                                                                                                                                                                                                                                                                                                                                                                                                                                                                                                                                                                                                                                                                                                                                                                                                                                                                                                                                                                                                                                                             |
| <p>Sequence No.<br/>10</p> | <p>Peroxisomal<br/>oxidase from<br/><i>Paenarthrobact<br/>er ureafaciens</i></p> | <p>ATGACCGAGGTGGTGGACCGAGCCTTCTCCCGCTCTCTGGCTCTACCACCGCCGCTGGCGAC<br/> GGCGCAAGGTGGCGCTCGAGCCTCGAGTGGACGTGGCCGCTCTGGGCGAGCAGCTCCTCGGCCG<br/> ATGGGCGGACATCCGACTGCAGCCCGAGATCTGGCCGGACGAGAGGTGGTGCAGAAAGTGCAGG<br/> GACTGACCCACACCGAGCACCAGTCTCGAGTGTTCGGCCAGCTGAAGTACCTGGTGGACAACAAC<br/> GCCGTGCACCGAGCTTTCCTTCTCGACTCGCGGATCTGACGACCCAGCCGCAACATTTGCCGGC<br/> TTCGAGGAAGTGGTACTGCTGACCCCTCGTGCAGATCAAGGCCGGCTCCAGTGGGGCTGT<br/> CGGCTCTGCCGTGATGACCTGGGCACCCGAGAGCACCACACAAGTGGCTGCCCGCATCATGT<br/> CTCTCGAGATCCCGGCTGCTTCCGCATGACCGAGACTGGCCAGGGCTCTGACGTGGCCTCATCG<br/> CCACCACCGCCACCTACGACGAAGAGACTCAAGAGTTCGTGATCGACACACCTTCCGAGCCGCT<br/> GGAAGGACTACATCGGCAACCGCCCAACGACCGCCCTGGCCCGCTGTGTTCGCTCAGCTGATC<br/> ACCCGAAAGGTGAACCACGGCTCCACGCCTTCTACGTGGACCTGCGAGATCCCGCCACCGGCGA<br/> CTTCTGCCCCGAATCGGCGCGAGGACGACGGCATCAAGGGCGGCTGAACGGCATCGACAACG<br/> GACGACTGCATTCACCAACGTGCGAATTCGCCGAATAACCTGTGAACCGATACGGCGACGTG<br/> GCTGTGGACCGCAGCTACTTCTTACCATCGAGTCTCCCGCCGACGATTTCTCACCATGCTGGGA<br/> ACCCTGGTGCAGGGCCGAGTGTCTCTGGACGGCGCTGCCGTGGCCGCTCTAAGGTGGCCCTGCA<br/> GTCTGCCATCCACTACGCCCGGAGCGACGACAGTCAACGCCACCTCTCTACCAGGAAGAGG<br/> TGCTGTGGACTACCAGCGACATCAGCGACGACTGTTTACCAGACTGGCTACTACCTACGCTGCC<br/> TCTTTCGCCCACGAACAGCTGCTGCAAAAGTTCGACGACGTGTTCTCTGGCGCCACGACACCGA<br/> CGCCGACCGACAGGACTCTGAGACTCTGGCTGCCGCTCTGAAGCCCTGTTCAGCTGGACCGCCT<br/> GGACACCTGCAAGAGTGGGAGAGGCTGCCGGGAGCCGGCTTCTGATCGAGAACCATTG<br/> CCTCTCTGCGAGCTGACCTGGACGTGTACGTGACCTTCGAGGGCGACAACACCGTCTGTGTCAG<br/> CTGGTGGCAAGCGACTGCTGGCCGACTACGCCAAGGAATTCGAGGGCCCAACTTCGGCGTGT<br/> GGCCGATACGTGCTGGACAGGCCGCTGGCGTGGCTCTGACCCGAACCGCCGTCAGAGGTGG<br/> CCCAGTTCGTGGCCGACTCCGGCTCTGTGCAAGTCTGCCCTGGCTCTGCGAGATGAGGAAGGC<br/> CAGGAAACCTGCTGACCGACCGAGTGCAGTCTATGGTGGCCGAGGTGGGCGCTGCCCTGAAGGG<br/> CGCTGGCAAGTGGCCAGCACCAGGCTGTGCCCTGTTCAACAGCATCAGAACGAGTGTATCG<br/> AGGCCGCTCAGGCCACGCCGAGTGTCCAGTGGGAAGCCTTACCAGGCTCTGGCCAAAGGTG<br/> GACGACCGCCGACCAAGGAAGTGTGACCCGACTGCGGGACCTTTCGGACTGTCTCTGATTGA<br/> GAAGCACCTGTCTTGGTATCTGATGAACGGCCGACTGTCTATGCAGCGGGGACGAACCGTGGGCA<br/> CCTACATCAACCGACTGCTCGTGAAGATTGACCCACGCTCTGGACCTGGTGCAGCCCTTCGGCT<br/> ACGGCGCTGAGCATCTGCGAGCCGCAATTGCCACCGGTGCCGAGGCCACTCGACAGGACGAGGCC<br/> CGAACCTACTTCCGACAGCAGGAGCCTCTGGATCTGCCCTGCCGACGAAAGACCGCTGGCC<br/> ATTAAGGCCGCAAGTCCCGAGATCAGATTACCTCTGTGGGATCTTCTCGAAGCTGTAG</p> |
| <p>Sequence No.<br/>11</p> | <p>Peroxisomal<br/>oxidase from<br/><i>Rattus<br/>norvegicus</i></p>             | <p>ATGAACCCGACCTGCGAAAGAACGAGCCTTGGCCTTTCAACCCGAGCTGATCACCACAT<br/> CCTGGACGGCTCTCCGAGAACACCCGACGACGAGAGAAATCGAGAACCTGATCTGAACGACC<br/> CCGACTTCCAGCAGGAGTACAACCTTTCGACCCGATCTCAGCGATACGAGGTGGCCGTGAAG<br/> AAGTCTGCCACCATGTTCAAGAAGATGCGAGAGTACGGCATCTCTGACCCGAAAGAGATCATGTG<br/> GTTCAAGAACTCTGTGACCGAGGACACCCTGAGCCTCTGGACCTGCACCTGGGCATGTTTCTGC<br/> CCACTCTGCTGCACAGGCTACCGCCGAGCAGCAAGAGCGATTCTTTCATGCCCGCTGGAACCTCG<br/> AGATCACCGGCCTACGCTCAGACCGAGATGGGCCAGGCCACCCACTCCGAGGACTCGAGACT<br/> ACCGCCACTTACGACCCCAAGACTCAAGAGTTCATCCTGAACTCTCCACCGTACCTCTATCAAG<br/> TGGTGGCCCGTGGCCTGGGCAAGACCTTAAACACGCCATCGTGTGGCCAGCTGATTACCCA<br/> GGGCGAGTGTACGGCCTGCACGCCTTCTGGTGGCCATCCGAGAGATCGGAACCCACAAGCCAC<br/> TGCCTGGCATCACCCTGGGCGACATCGGCCCAAGTTCGGCTACGAGGAAATGGACAACGGCTAC<br/> CTGAAGATGGACAACCTACGAATTCCTCGAGAGAATGCTGATGAAGTACGCCAGGTGAAGCC<br/> CGACGGAACCTACGTGAAGCCCTGTCTAAAGTGAACCTACCGAACCAGCCGATGGTGTTCGTGCGAT<br/> CTTCTCTGGTGGGCAACCGCCTCAGTCTCTGTCTAAGGCTGCACCATGGCATCCGATACTCTG<br/> CCGTGCGACGACGCTGAGATCAAGCAGTCTGAGCCCGAGCCTCAGATCTGGACTTTCAGACC<br/> CAGCAGTACAAGCTGTTCCTCTGCTGGCCACCGCCTACGCTTCCACTTCTGTGGCCGATATATG<br/> AAGGAAACCTACCTGCAATCAACGAGTCTATCGGCCAGGGCAGCTGTCTGAGTGCAGGAGCT<br/> GCACGCCCTGACCGCCGACTGAAGGCTTTCACCACTGGACCCGCAACCCGCGCATCGAGGAAT<br/> GCCGAATGGCCTGTGGCGGCCACGGCTACTCTCACTCTCTGGCATCCCAACATCTACGTGACCT<br/> TCACTCCCGCTGCACCTTCGAGGGTGAAGAACACCGTGTATGCTGCAGACCGCTCGATTCTCTG<br/> ATGAAGATCTACGACAGGTGCGATCTGGCAAGCTGGTGGCGGCATGGTGTCTTACCTGAACGA<br/> TCTGCCCTCTACGCAATTCAGCCTCAGCAGGTGGCGTGTGGCCCATCTGTGGTGCATCAACT<br/> CGCTCGAGGGCTGACCGAGGCTACAAGTGGGAGCCGCTGACTGGTGCAGATCGCCGCAAG<br/> AACCTGCAGACCCAGTGTCTACCGAAAGTCAAGGAAGTGGCTGGAACCTGACCTCTGTGGA</p>                                                                                                                                                                                                                                                                                                                                                                                                                                                                                                                                                                                                                                         |

|                 |                                             |                                                                                                                                                                                                                                                                                                                                                                                                                                                                                                                                                                                                                                                                                                                          |
|-----------------|---------------------------------------------|--------------------------------------------------------------------------------------------------------------------------------------------------------------------------------------------------------------------------------------------------------------------------------------------------------------------------------------------------------------------------------------------------------------------------------------------------------------------------------------------------------------------------------------------------------------------------------------------------------------------------------------------------------------------------------------------------------------------------|
|                 |                                             | CCTGGTGGAGCTTCTGAGGCCACTGCCACTACGTGGTGGTGAAGGTGTTCTCTGACAAGCTGCCAAGATCCAGGACAAGGCTGTCCAGGCCGTGCTGCGAAACCTGTGCTGTACTCTCTGTACGGAATCTCTCAGAAGGGCGGACTTCTCGAGGGCTCTATCATCACCGCGCTCAGCTGTCTCAGGTCAACGCTCGAATCCTCGAGCTGTGACCCTGATTTCGACCCAACGCGGTGGCTCTGGTGGACGCTTTGACTTCAAGGACATGACCCTGGGCTCTGTGCTGGGACGATACGACGGCAACGTGTACGAGAACCTCTCGAGTGGGCAAGAAGTCTCCCTGAAACAAGACCGAGGTGCACGAGTCTTACCACAA GCACCTGAAGCCTCTGCAGTCTAAGCTGGACCAGATTACCTCCGTGGGATCTTCTCGAAGCTGTAG                                                                                                                                                                                                                                                              |
| Sequence No. 12 | Humanized renilla green fluorescent protein | ATGGTGAGCAAGCAGATCCTGAAGAACACCTGCCTGCAGGAGGTGATGAGCTACAAGGTGAACCTGGAGGGCATCGTGAACAACCACGTGTTACCATTGGAGGGCTGCGGCAAGGGCAACATCCTGTTCCGCAACCAGCTGGTGCAGATCCGCGTGACCAAGGGCGCCCTGCCTTCGCCTTCGACATCGTGGAGCCCGCTTCCAGTACGGCAACCGACCTTACCAAGTACCCCAACGACATCAGCGACTACTT CATCCAGAGCTTCCCGCGGCTTTCATGTACGAGCGCACCTGCGCTACGAGGACGGCGGCTGGTGGAGATCCGCAGCGACATCAACCTGATCGAGGACAAGTTCGTGTACCGCTGGAGTACAAGGGCAGCAACTTCCCGCAGCAGCGGCCCTGATGCAGAAGACCATCCTGGGCATCGAGCCAGCTTCGAGGCCATGTACATGAACAACGGCGTGTGGTGGGCGAGGTGATCCTGGTGTACAAGCTGAACAGCGCAAGTACTACAGTGCACATGAAGACCTGATGAAGAGCAAGGGCGTGGTGAAGGATTTCCCTTCCTACCACTTCATCCAGCACCGCCTGGAGAAGACCTACGTGGAGGACGGCGGCTTCGTGGAGCAGCAGACCGCATCGCCAGATGACCAGCATCGGCAAGCCCTGGGCAGCCTGCACGAGTGGTGTAA |
| Sequence No. 13 | mCherry                                     | ATGGTGTCTAAGGGCGAAGAGGACAACATGGCCATCATCAAGGAATTCATGCGATTCAAGGTGCACATGAAGGCTCTGTGAACGGCCACGAGTTCGAGATCGAAGGCGAAGGCGAGGACACCCTACGAGGGCACCCAGACCGCAAGCTGAAGGTGACCAAGGGCGGACCCCTGCCTTTCGCTGGGACAT TCTGTCTCCCAGTTCATGTACGGCTTAAGGCCTACGTGAAGCACCCCGCCGACATTCGCGACTA CCTGAAGCTGTGTTCCCGGAGGGCTTCAAGTGGGAGCGAGTGTAACTTCGAGGACGGCGGCGTGGTGACCGTGACTCAGGACTTTCGCTGCAGGACGGCGAGTTCATCTACAAGGTGAAGCTGCGA GGCACCAACTTTCCTCTGACGGCCCGTGTGCAAAAAGAAGACCATGGGCTGGGAAGCCTTCTTGAGCGAATGTACCCGAGGACGGTGCCTGAAGGGCGAGATCAAGCAGCGACTGAAGCTCAAGGACGGTGCCACTACGACGCGGAGGTCAAGACCACCTACAAGGCAAGAAGCCGTCAGTCCCTGGCGCTACAACGTGAACATCAAGCTGGACATCACCTCTACAACGAGGACTACACCATCGTCGAGCAGTACGAGCGAGCGGCGGACACTTACCGGCGCATGGACGAGCTGTACAAGTAG            |

Supplementary table S3. Biobricks used in this study

| ID     | Description                   | Forward primer | Reversed primer | Template DNA          | Reference        |
|--------|-------------------------------|----------------|-----------------|-----------------------|------------------|
| BB8302 | {-PrTEF1intron                | PR-18928       | PR-18975        | Genomic DNA of ST4840 | This study       |
| BB2068 | Har_FAR_Ylop->                | PR-18066       | PR-16595        | Sequence No. 1        | This study       |
| BB2720 | {-PrTEF1intron_USER_forfusion | PR-18930       | PR-18214        | Genomic DNA of ST4840 | This study       |
| BB8644 | PrGPD_forfusion-}             | PR-23004       | PR-22213        | Genomic DNA of ST4840 | This study       |
| BB8640 | Dmd9{-PrTEF1intron_forfusion  | PR-19018       | PR-18930        | Sequence No. 2        | This study       |
| BB2693 | {-Lbo_PPTQ                    | PR-21723       | PR-21724        | Sequence No. 3        | This study       |
| BB1135 | Vector backbone               | See ref.       | See ref.        | See ref.              | Holkenbrink 2018 |
| BB8769 | {-Ase_POX                     | PR-23435       | PR-23436        | Sequence No. 4        | This study       |
| BB2709 | Lbo31670->                    | PR-21755       | PR-21756        | Sequence No. 5        | This study       |
| BB1558 | PrExp-}                       | PR-15521       | PR-15522        | Genomic DNA of ST4840 | This study       |
| BB2710 | Lbo49554->                    | PR-21757       | PR-21758        | Sequence No. 6        | This study       |
| BB1635 | PrtRNA-Gly                    | See ref.       | See ref.        | See ref.              | Holkenbrink 2018 |
| BB1636 | crRNA-TRPR                    | See ref.       | See ref.        | See ref.              | Holkenbrink 2018 |
| BB8516 | {-Yli_POX2                    | PR-22827       | PR-22828        | Genomic DNA of ST4840 | This study       |
| BB8517 | {-Yli_POX3                    | PR-22829       | PR-22830        | Genomic DNA of ST4840 | This study       |
| BB8519 | {-Yli_POX5                    | PR-22833       | PR-22834        | Genomic DNA of ST4840 | This study       |
| BB8523 | {-Ani_POX                     | PR-22841       | PR-22842        | Sequence No. 7        | This study       |
| BB8524 | {-Cma_POX                     | PR-22843       | PR-22844        | Sequence No. 8        | This study       |
| BB8525 | {-Hsa_POX                     | PR-22845       | PR-22846        | Sequence No. 9        | This study       |
| BB8526 | {-Pur_POX                     | PR-22847       | PR-22848        | Sequence No. 10       | This study       |
| BB8527 | {-Rno_POX                     | PR-22849       | PR-22850        | Sequence No. 11       | This study       |
| BB1688 | ->PrTEF1intron                | See ref.       | See ref.        | See ref.              | Petkevicius 2021 |

|         |                            |          |          |                       |                  |
|---------|----------------------------|----------|----------|-----------------------|------------------|
| BB1740  | Har_FAR_codoptYL           | See ref. | See ref. | See ref.              | Holkenbrink 2020 |
| BB9309  | PrTEF1intron_HarFAR_Per2   | PR-10595 | PR-24919 | pBP8236               | This study       |
| BB8682  | IntD_2_dwn                 | PR-23172 | PR-23173 | Genomic DNA of ST4840 | This study       |
| BB8681  | IntD_2_up                  | PR-23171 | PR-23170 | Genomic DNA of ST4840 | This study       |
| BB2313  | Fas2 (I1220F)              | See ref. | See ref. | See ref.              | Petkevicius 2021 |
| BB8679  | IntE_7_up                  | PR-23167 | PR-23166 | Genomic DNA of ST4840 | This study       |
| BB8680  | IntE_7_dwn                 | PR-23168 | PR-23169 | Genomic DNA of ST4840 | This study       |
| BB1631  | TPex20-TLip2               | See ref. | See ref. | See ref.              | Holkenbrink 2018 |
| BB8386  | IntF_5_Up                  | PR-22532 | PR-22533 | Genomic DNA of ST4840 | This study       |
| BB8387  | IntF_5_Down                | PR-22534 | PR-22535 | Genomic DNA of ST4840 | This study       |
| BB10144 | PrTEF1intronHarFARforhrGFP | PR-10595 | PR-26919 | pBP8236               | This study       |
| BB10145 | hrGFPforHarFAR             | PR-26920 | PR-15506 | Sequence No. 12       | This study       |
| BB10146 | hrGFPforHarFAR_Per2        | PR-26920 | PR-26921 | Sequence No. 12       | This study       |
| BB2093  | PrTEF1intron_USER-}        | See ref. | See ref. | See ref.              | Petkevicius 2021 |
| BB10154 | YliPOX3formCherry          | PR-24936 | PR-26932 | Genomic DNA of ST4840 | This study       |
| BB10155 | YliALE1formCherry          | PR-26926 | PR-26933 | Genomic DNA of ST4840 | This study       |
| BB10156 | mCherryforYliPOX3          | PR-26934 | PR-26936 | Sequence No. 13       | This study       |
| BB10157 | mCherryforYliALE1          | PR-26935 | PR-26936 | Sequence No. 13       | This study       |

Supplementary table S4. Plasmids used in this study

| ID       | Description                                  | Parent plasmid | Biobricks/primers                  | Reference        |
|----------|----------------------------------------------|----------------|------------------------------------|------------------|
| pCfB6630 | pNat-YLgRNA3_IntC_3                          | See ref.       | See ref.                           | Holkenbrink 2018 |
| pBP8754  | pIntF_3-Ase_POX_GeneArt{-PrEXP               | pBP8009        | BB2721, BB8769                     | This study       |
| pBP8627  | pIntD_2-Dmd9{-PrTEF1intron-PrGPD-}HarFAR     | pBP8620        | BB8640, BB2720, BB8644, BB2068     | This study       |
| pBP8400  | pIntC_3-TPex20-PrEXP-}Lbo31670-TLip2         | pCfB6371       | BB2709, BB1558                     | This study       |
| pBP8401  | pIntC_3-TPex20-PrEXP-}Lbo49554-TLip2         | pCfB6371       | BB2710, BB1558                     | This study       |
| pBP8802  | pIntD_2-Lbo_PPTQ{-PrTEF1intron-PrGPD-}HarFAR | pBP8620        | BB2693, BB2720, BB8644, BB2068     | This study       |
| pCfB7088 | pNat-YLgRNA1_Fas2 (AA1220)                   | See ref.       | See ref.                           | Holkenbrink 2020 |
| pBP8900  | pHph_YLgRNA5_IntE_4                          | pCfB3431       | BB1635, BB1636, PR-23285, PR-23286 | This study       |
| pBP8340  | pIntC_3-TPex20-Yli_POX2{-PrTEF1-TLip2        | pCfB6371       | BB8516, BB8302                     | This study       |
| pBP8341  | pIntC_3-TPex20-Yli_POX3{-PrTEF1-TLip2        | pCfB6371       | BB8517, BB8302                     | This study       |
| pBP8343  | pIntC_3-TPex20-Yli_POX5{-PrTEF1-TLip2        | pCfB6371       | BB8519, BB8302                     | This study       |
| pBP8347  | pIntC_3-TPex20-Ani_POX{-PrTEF1-TLip2         | pCfB6371       | BB8523, BB8302                     | This study       |
| pBP8348  | pIntC_3-TPex20-Cma_POX{-PrTEF1-TLip2         | pCfB6371       | BB8524, BB8302                     | This study       |
| pBP8349  | pIntC_3-TPex20-Hsa_POX{-PrTEF1-TLip2         | pCfB6371       | BB8525, BB8302                     | This study       |
| pBP8350  | pIntC_3-TPex20-Pur_POX{-PrTEF1-TLip2         | pCfB6371       | BB8526, BB8302                     | This study       |
| pBP8351  | pIntC_3-TPex20-Rno_POX{-PrTEF1-TLip2         | pCfB6371       | BB8527, BB8302                     | This study       |
| pBP8003  | pNat-YLgRNA4_IntF_3                          | pCfB3405       | BB1635, BB1636, PR-22039, PR-22040 | This study       |
| pBP8623  | pNat_YLgRNA1_IntD_2                          | pCfB3405       | BB8736                             | This study       |
| pBP8576  | pHph_YLgRNA1_IntD_2                          | pCfB3431       | BB1635, BB1636, PR-23192, PR-23193 | This study       |



|          |                                                                  |          |                                    |                  |
|----------|------------------------------------------------------------------|----------|------------------------------------|------------------|
| pBP8032  | pHph-YLgRNA3_IntC_3                                              | pCfB3431 | BB1635, BB1636, PR-18239, PR-18240 | This study       |
| pBP8236  | pIntE_4-PrTEF1intron->HarFAR                                     | pCf6679  | BB1688, BB1740                     | This study       |
| pBP9438  | pIntE_4-PrTEF1intron_HarFAR_Per2                                 | pCf6679  | BB9309                             | This study       |
| pBP8009  | pIntF_3-TPex20-TLip2                                             |          | BB1135, BB1631, BB8031, BB1480     | This study       |
| pBP6371  | pIntC_3-TPex20-TLip2                                             | See ref. | See ref.                           | Holkenbrink 2018 |
| pBP3405  | pORI1001-Nat-CEN1-USER                                           | See ref. | See ref.                           | Holkenbrink 2018 |
| pBP3431  | pORI1001-Hphsyn-CEN1-USER                                        | See ref. | See ref.                           | Holkenbrink 2020 |
| pBP6679  | pIntE_4-TPex20-TLip2                                             | See ref. | See ref.                           | Holkenbrink 2018 |
| pBP8620  | pIntD_2-TPex20-TLip2                                             |          | BB1135, BB8682, BB8681             | This study       |
| pBP8575  | pNat_YLgRNA1_IntE_7                                              |          | BB1635, BB1636, PR-23190, PR-23191 | This study       |
| pBP8645  | pHph_YLgRNA4_IntF_5                                              |          | BB1635, BB1636, PR-23127, PR-23128 | This study       |
| pBP8662  | pIntE_7-TPex20-TLip2                                             |          | BB1135, BB8679, BB8680, BB1631     | This study       |
| pBP8263  | IntF_5_Up_TPex20-USER-TLip2_IntF_5_Down                          |          | BB1135, BB8386, BB1631, BB8387     | This study       |
| pBP10672 | pIntE_7-TPex20-PrTEF1intron_HarFAR_hrGFP-TLip2                   | pBP8662  | BB10144, BB10145                   | This study       |
| pBP10669 | pIntE_7-TPex20- PrTEF1intron_HarFAR_hrGFP_Per2-TLip2             | pBP8662  | BB10144, BB10146                   | This study       |
| pBP10676 | IntF_5_Up_TPex20- PrTEF1intron_YliPOX3_mCherry-TLip2_IntF_5_Down | pBP8263  | BB2093, BB10154, BB10156           | This study       |
| pBP10677 | IntF_5_Up_TPex20- PrTEF1intron_YliALE1_mCherry-TLip2_IntF_5_Down | pBP8263  | BB2093, BB10155, BB10157           | This study       |

Supplementary table S5. Strains used in this study

| ID     | Relevant features                                                                | Parent strain | Added elements    | Reference/source                          |
|--------|----------------------------------------------------------------------------------|---------------|-------------------|-------------------------------------------|
| ST4840 | Wild-type <i>Yarrowia lipolytica</i>                                             |               |                   | Agricultural Research Service (NRRL, USA) |
| ST6629 | See ref.                                                                         | See ref.      | See ref.          | Holkenbrink 2020                          |
| ST8524 | See ref.                                                                         | See ref.      | See ref.          | Petkevicius 2021                          |
| ST9138 | $\Delta$ POX1-6                                                                  | See ref.      | See ref.          | Patent application WO/2020/169389         |
| ST9199 | $\Delta$ POX1-6, IntC_3-Yli_POX2{-TEF1                                           | ST9138        | pCfB6630, pBP8340 | This study                                |
| ST9200 | $\Delta$ POX1-6, IntC_3-Yli_POX3{-TEF1                                           | ST9138        | pCfB6630, pBP8341 | This study                                |
| ST9202 | $\Delta$ POX1-6, IntC_3-Yli_POX5{-TEF1                                           | ST9138        | pCfB6630, pBP8343 | This study                                |
| ST9206 | $\Delta$ POX1-6, IntC_3-Ani_POX{-TEF1                                            | ST9138        | pCfB6630, pBP8347 | This study                                |
| ST9207 | $\Delta$ POX1-6, IntC_3-Cma_POX{-TEF1                                            | ST9138        | pCfB6630, pBP8348 | This study                                |
| ST9208 | $\Delta$ POX1-6, IntC_3-Hsa_POX{-TEF1                                            | ST9138        | pCfB6630, pBP8349 | This study                                |
| ST9209 | $\Delta$ POX1-6, IntC_3-Pur_POX{-TEF1                                            | ST9138        | pCfB6630, pBP8350 | This study                                |
| ST9210 | $\Delta$ POX1-6, IntC_3-Rno_POX{-TEF1                                            | ST9138        | pCfB6630, pBP8351 | This study                                |
| ST9284 | $\Delta$ POX1-6, IntF_3-Ase_POX{-PrEXP                                           | ST9138        | pBP8754, pBP8003  | This study                                |
| ST9294 | $\Delta$ POX1-6, IntD_2-Dmd9{-PrTEF1intron-PrGPD-}HarFAR                         | ST9138        | pBP8627, pBP8623  | This study                                |
| ST9295 | $\Delta$ POX1-6, IntC_3-Yli_POX2{-PrEXP, IntD_2-Dmd9{-PrTEF1intron-PrGPD-}HarFAR | ST9199        | pBP8627, pBP8576  | This study                                |
| ST9296 | $\Delta$ POX1-6, IntC_3-Yli_POX3{-PrEXP, IntD_2-Dmd9{-PrTEF1intron-PrGPD-}HarFAR | ST9200        | pBP8627, pBP8576  | This study                                |
| ST9297 | $\Delta$ POX1-6, IntC_3-Yli_POX5{-PrEXP, IntD_2-Dmd9{-PrTEF1intron-PrGPD-}HarFAR | ST9202        | pBP8627, pBP8576  | This study                                |
| ST9298 | $\Delta$ POX1-6, IntC_3-Ani_POX{-PrEXP, IntD_2-Dmd9{-PrTEF1intron-PrGPD-}HarFAR  | ST9206        | pBP8627, pBP8576  | This study                                |
| ST9299 | $\Delta$ POX1-6, IntC_3-Cma_POX{-PrEXP, IntD_2-Dmd9{-PrTEF1intron-PrGPD-}HarFAR  | ST9207        | pBP8627, pBP8576  | This study                                |
| ST9300 | $\Delta$ POX1-6, IntC_3-Hsa_POX{-PrEXP, IntD_2-Dmd9{-PrTEF1intron-PrGPD-}HarFAR  | ST9208        | pBP8627, pBP8576  | This study                                |

|         |                                                                                                                                       |           |                  |            |
|---------|---------------------------------------------------------------------------------------------------------------------------------------|-----------|------------------|------------|
| ST9301  | $\Delta$ POX1-6, IntC_3-Pur_POX{-PrEXP, IntD_2-Dmd9{- PrTEF1intron-PrGPD-}HarFAR                                                      | ST9209    | pBP8627, pBP8576 | This study |
| ST9302  | $\Delta$ POX1-6, IntC_3-Rno_POX{-PrEXP, IntD_2-Dmd9{- PrTEF1intron-PrGPD-}HarFAR                                                      | ST9210    | pBP8627, pBP8576 | This study |
| ST9329  | $\Delta$ POX1-6, IntF_3-Ase_POX{-PrEXP, IntD_2-Dmd9{- PrTEF1intron-PrGPD-}HarFAR                                                      | ST9284    | pBP8627, pBP8576 | This study |
| ST9347  | $\Delta$ POX1-6, IntD_2-Dmd9{- PrTEF1intron-PrGPD-}HarFAR, IntC_3-PrEXP-}Lbo_31670                                                    | ST9294    | pBP8400, pBP8032 | This study |
| ST9348  | $\Delta$ POX1-6, IntD_2-Dmd9{- PrTEF1intron-PrGPD-}HarFAR, IntC_3-PrEXP-}Lbo_49554                                                    | ST9294    | pBP8401, pBP8032 | This study |
| ST9314  | $\Delta$ POX1-6, $\Delta$ POX1-6, IntD_2-Lbo_PPTQ{- PrTEF1intron -PrGPD-}HarFAR                                                       | ST9138    | pBP8802, pBP8623 | This study |
| ST9315  | $\Delta$ POX1-6, IntC_3-Yli_POX2{-PrEXP, IntD_2-Lbo_PPTQ{- PrTEF1intron-PrGPD-}HarFAR                                                 | ST9199    | pBP8802, pBP8576 | This study |
| ST9316  | $\Delta$ POX1-6, IntC_3-Yli_POX3{-PrEXP, IntD_2-Lbo_PPTQ{- PrTEF1intron-PrGPD-}HarFAR                                                 | ST9200    | pBP8802, pBP8576 | This study |
| ST9317  | $\Delta$ POX1-6, IntC_3-Yli_POX5{-PrEXP, IntD_2-Lbo_PPTQ{- PrTEF1intron-PrGPD-}HarFAR                                                 | ST9202    | pBP8802, pBP8576 | This study |
| ST9318  | $\Delta$ POX1-6, IntC_3-Ani_POX{-PrEXP, IntD_2-Lbo_PPTQ{- PrTEF1intron-PrGPD-}HarFAR                                                  | ST9206    | pBP8802, pBP8576 | This study |
| ST9319  | $\Delta$ POX1-6, IntC_3-Cma_POX{-PrEXP, IntD_2-Lbo_PPTQ{- PrTEF1intron-PrGPD-}HarFAR                                                  | ST9207    | pBP8802, pBP8576 | This study |
| ST9320  | $\Delta$ POX1-6, IntC_3-Hsa_POX{-PrEXP, IntD_2-Lbo_PPTQ{- PrTEF1intron-PrGPD-}HarFAR                                                  | ST9208    | pBP8802, pBP8576 | This study |
| ST9321  | $\Delta$ POX1-6, IntC_3-Pur_POX{-PrEXP, IntD_2-Lbo_PPTQ{- PrTEF1intron-PrGPD-}HarFAR                                                  | ST9209    | pBP8802, pBP8576 | This study |
| ST9322  | $\Delta$ POX1-6, IntC_3-Rno_POX{-PrEXP, IntD_2-Lbo_PPTQ{- PrTEF1intron-PrGPD-}HarFAR                                                  | ST9210    | pBP8802, pBP8576 | This study |
| ST9330  | $\Delta$ POX1-6, IntF_3-Ase_POX{-PrEXP, IntD_2-Lbo_PPTQ{- PrTEF1intron-PrGPD-}HarFAR                                                  | ST9284    | pBP8802, pBP8576 | This study |
| ST9350  | $\Delta$ POX1-6, IntD_2-Lbo_PPTQ{- PrTEF1intron -PrGPD-}HarFAR, IntC_3-PrEXP-}Lbo_31670                                               | ST9314    | pBP8400, pBP8032 | This study |
| ST9351  | $\Delta$ POX1-6, IntD_2-Lbo_PPTQ{- PrTEF1intron -PrGPD-}HarFAR, IntC_3-PrEXP-}Lbo_49554                                               | ST9314    | pBP8401, pBP8032 | This study |
| ST10313 | $\Delta$ POX1-6, IntD_2-Dmd9{- PrTEF1intron -PrGPD-}HarFAR, IntC_3-PrEXP-}Lbo_31670, FAS2 (I1220F)                                    | ST9347    | pCfB7088, BB8908 | This study |
| ST10383 | $\Delta$ POX1-6, IntD_2-Dmd9{- PrTEF1intron -PrGPD-}HarFAR, IntC_3-PrEXP-}Lbo_31670, FAS2 (I1220F), IntE_4- PrTEF1intron ->HarFAR     | STST10313 | pBP8900, pBP8236 | This study |
| ST10384 | $\Delta$ POX1-6, IntD_2-Dmd9{- PrTEF1intron -PrGPD-}HarFAR, IntC_3-PrEXP-}Lbo_31670, FAS2 (I1220F), IntE_4- PrTEF1intron -HarFAR_Per2 | STST10313 | pBP8900, pBP9438 | This study |
| ST10314 | $\Delta$ POX1-6, IntD_2-Lbo_PPTQ{- PrTEF1intron -PrGPD-}HarFAR, IntC_3-PrEXP-}Lbo_31670, FAS2 (I1220F)                                | ST9350    | pCfB7088, BB8908 | This study |
| ST10387 | $\Delta$ POX1-6, IntD_2-Lbo_PPTQ{- PrTEF1intron -PrGPD-}HarFAR, IntC_3-PrEXP-}Lbo_31670, FAS2                                         | ST10314   | pBP8900, pBP8236 | This study |

|         |                                                                                                                                           |         |                   |            |
|---------|-------------------------------------------------------------------------------------------------------------------------------------------|---------|-------------------|------------|
|         | (I1220F), IntE_4- PrTEF1intron ->HarFAR                                                                                                   |         |                   |            |
| ST10388 | $\Delta$ POX1-6, IntD_2-Lbo_PPTQ{-PrTEF1intron -PrGPD-}HarFAR, IntC_3-PrEXP-}Lbo_31670, FAS2 (I1220F), IntE_4- PrTEF1intron ->HarFAR_Per2 | ST10314 | pBP8900, pBP9438  | This study |
| ST12413 | $\Delta$ POX1-6, IntE_7- PrTEF1intron_HarFAR_hrGFP                                                                                        | ST9138  | pBP8575, pBP10672 | This study |
| ST12410 | $\Delta$ POX1-6, IntE_7- PrTEF1intron_HarFAR_hrGFP_Per2                                                                                   | ST9138  | pBP8575, pBP10669 | This study |
| ST12433 | $\Delta$ POX1-6, IntE_7- PrTEF1intron_HarFAR_hrGFP, IntF_5-PrTEF1intron_YliPOX3_mCherry-                                                  | ST12413 | pBP8645, pBP10676 | This study |
| ST12434 | $\Delta$ POX1-6, IntE_7- PrTEF1intron_HarFAR_hrGFP, IntF_5-PrTEF1intron_YliALE1_mCherry-                                                  | ST12413 | pBP8645, pBP10677 | This study |
| ST12424 | $\Delta$ POX1-6, IntE_7- PrTEF1intron_HarFAR_hrGFP_Per2, IntF_5-PrTEF1intron_YliPOX3_mCherry-TLip2_IntF_5_Down                            | ST12410 | pBP8645, pBP10676 | This study |
| ST12425 | $\Delta$ POX1-6, IntE_7- PrTEF1intron_HarFAR_hrGFP_Per2, IntF_5-PrTEF1intron_YliALE1_mCherry-TLip2_IntF_5_Down                            | ST12410 | pBP8645, pBP10677 | This study |

Supplementary materials and methods relevant for generation of data presented in supplementary table S6 and supplementary figure S7.

*Y. lipolytica* strains were inoculated into 37.5 mL of YPG media in 250 mL shake flasks at OD<sub>600</sub>=0.2 and cultivated for 22 h at 28°C, shaken at 300 rpm at 5 cm orbit cast. Cell growth over time was monitored by measuring optical density using GENESYS™ 10S UV-Vis Spectrophotometer (Thermo Scientific). After 22 h of growth, cultivation broth was transferred into 50 mL falcon tube, centrifuged for 5 min at room temperature at 3000xg. The supernatant was discarded, and the cells resuspended in 20 mL production medium. Resuspended cells were transferred back to shake flasks and 0.4% (v/v) of 14:Me supplied. For cell dry weight and glycerol measurements, 1 mL cultivation broth was taken and centrifuged for 5 min at room temperature at 12500xg. Supernatant was used for glycerol measurements. Cell pellet was resuspended in 1 mL 70% ethanol and centrifuged for 5 min at room temperature at 12500xg. Liquid was removed and pellet was kept for 72 h in the 70°C degrees oven before weight measurements. Glycerol was measured using Radox GY105 glycerol assay. Quantification of 14:Me and Z7-12:OH was performed using GC-FID under the same settings as for data presented in Figures S1 and S2. Quantification of Z9-12:OH was performed under the same settings as for data presented in Figure 2.

Supplementary table S6. Titters and specific yields (g of product/g of dry weight) of Z7-12:OH, Z9-12:OH and Z7-14:OH at the end of shake flask cultivations (52h after media exchange).

| Product<br>Strain | Z7-12:OH                                                             | Z9-12:OH                                                             | Z7-14:OH                                                             |
|-------------------|----------------------------------------------------------------------|----------------------------------------------------------------------|----------------------------------------------------------------------|
| ST10384           | 1.13±0.05 mg/L<br>$Y_{xp}=4.8 \times 10^{-5} \pm 4.4 \times 10^{-6}$ | 0 mg/L<br>$Y_{xp}=0$                                                 | 0.15±0.04 mg/L<br>$Y_{xp}=6.4 \times 10^{-6} \pm 2.1 \times 10^{-6}$ |
| ST10388           | 0 mg/L<br>$Y_{xp}=0$                                                 | 0.33±0.07 mg/L<br>$Y_{xp}=1.1 \times 10^{-5} \pm 1.9 \times 10^{-6}$ | 0.13±0.06 mg/L<br>$Y_{xp}=4.3 \times 10^{-6} \pm 2.2 \times 10^{-6}$ |

Supplementary references:

Holkenbrink C, Dam MI, Kildegaard KR *et al.* EasyCloneYALI: CRISPR/Cas9-Based Synthetic Toolbox for Engineering of the Yeast *Yarrowia lipolytica*. *Biotechnol J* 2018; 13:1–8.

Holkenbrink C, Ding BJ, Wang HL, *et al.* Production of moth sex pheromones for pest control by yeast fermentation. *Metab Eng* 2020, DOI:10.1101/2020.07.15.205047.

Petkevicius K, Koutsoumpeli E, Betsi PC *et al.* Biotechnological production of the European corn borer sex pheromone in the yeast *Yarrowia lipolytica*. *Biotechnol J* 2021, DOI:10.1002/biot.202100004

| Chromatogram number | Strain ID | FAD  | FAR    | Peroxisomal oxidase |
|---------------------|-----------|------|--------|---------------------|
| 1                   | ST9294    | Dmd9 | HarFAR | -                   |
| 2                   | ST9295    |      |        | YliPOX2             |
| 3                   | ST9296    |      |        | YliPOX3             |
| 4                   | ST9297    |      |        | YliPOX5             |
| 5                   | ST9298    |      |        | AniPOX              |
| 6                   | ST9299    |      |        | CmaPOX              |
| 7                   | ST9300    |      |        | HsaPOX              |
| 8                   | ST9301    |      |        | PurPOX              |
| 9                   | ST9302    |      |        | RnoPOX              |
| 10                  | ST9329    |      |        | AsePOX              |
| 11                  | ST9347    |      |        | Lbo_31670           |
| 12                  | ST9348    |      |        | Lbo_49554           |

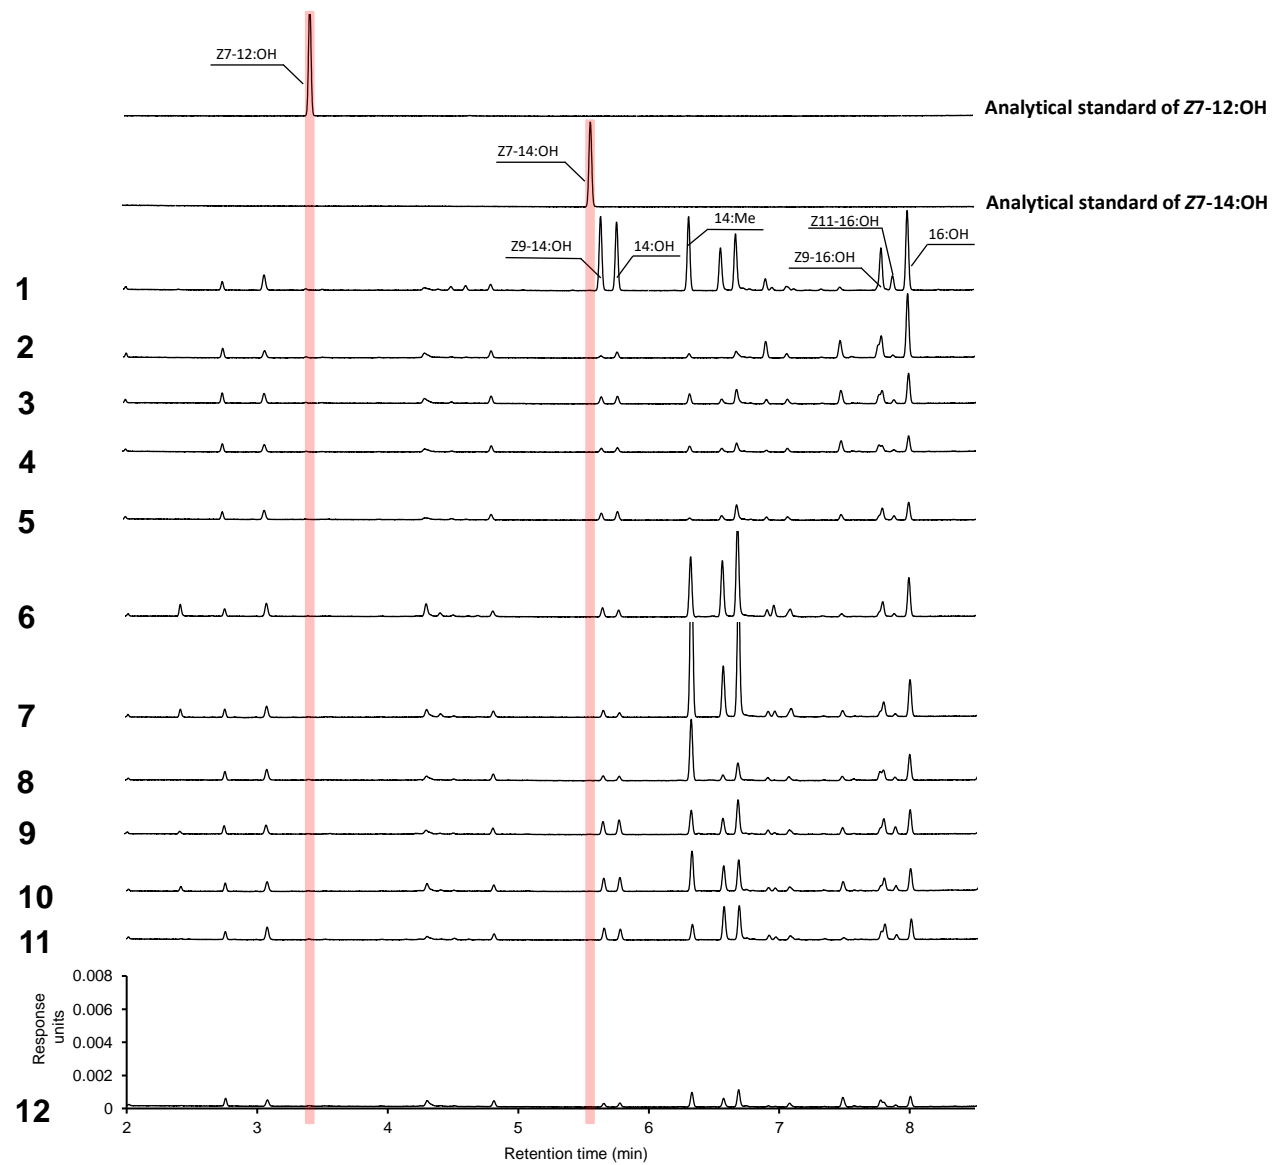

Figure S1. Fatty alcohol profiles obtained from the *Y. lipolytica* strains containing Dmd9, HarFAR and different POXes. Cultivation media was supplemented with 0.24% (v/v) of 14:Me.

| Chromatogram number | Strain ID | FAD      | FAR    | Peroxisomal oxidase |
|---------------------|-----------|----------|--------|---------------------|
| 1                   | ST9314    | Lbo_PPTQ | HarFAR | -                   |
| 2                   | ST9315    |          |        | YliPOX2             |
| 3                   | ST9316    |          |        | YliPOX3             |
| 4                   | ST9317    |          |        | YliPOX5             |
| 5                   | ST9318    |          |        | AniPOX              |
| 6                   | ST9319    |          |        | CmaPOX              |
| 7                   | ST9320    |          |        | HsaPOX              |
| 8                   | ST9321    |          |        | PurPOX              |
| 9                   | ST9322    |          |        | RnoPOX              |
| 10                  | ST9330    |          |        | AsePOX              |
| 11                  | ST9350    |          |        | Lbo_31670           |
| 12                  | ST9351    |          |        | Lbo_49554           |

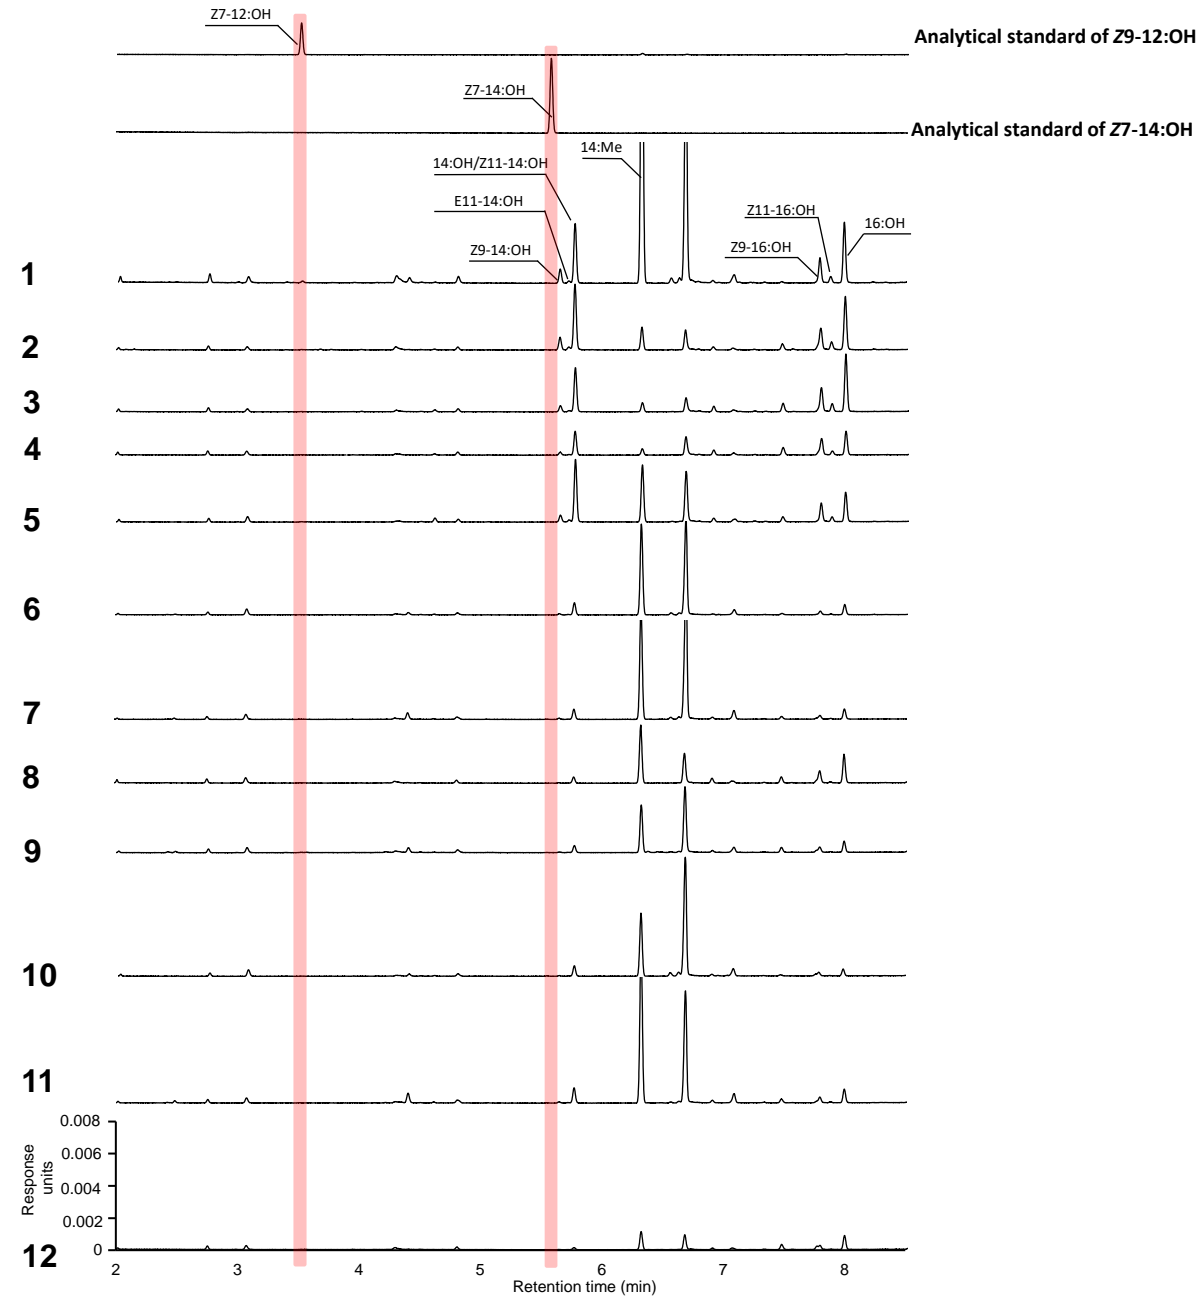

Figure S2. Fatty alcohol profiles obtained from the *Y. lipolytica* strains containing Lbo\_PPTQ, HarFAR and different POXes. Cultivation media was supplemented with 0.24% (v/v) of 14:Me.

|                              |       |       |   |   |   |   |   |       |       |       |       |       |       |       |
|------------------------------|-------|-------|---|---|---|---|---|-------|-------|-------|-------|-------|-------|-------|
| % of Z7-12:Me in total FAMES | 0.004 | 0.032 | 0 | 0 | 0 | 0 | 0 | 0.185 | 0.093 | 0.195 | 0.046 | 0.036 | 0.370 | 0.003 |
| % of Z9-12:Me in total FAMES | 0     | 0     | 0 | 0 | 0 | 0 | 0 | 0     | 0     | 0     | 0     | 0     | 0     | 0     |
| % of Z7-14:Me in total FAMES | 0     | 0     | 0 | 0 | 0 | 0 | 0 | 0.023 | 0.012 | 0.014 | 0.021 | 0     | 0.037 | 0.032 |

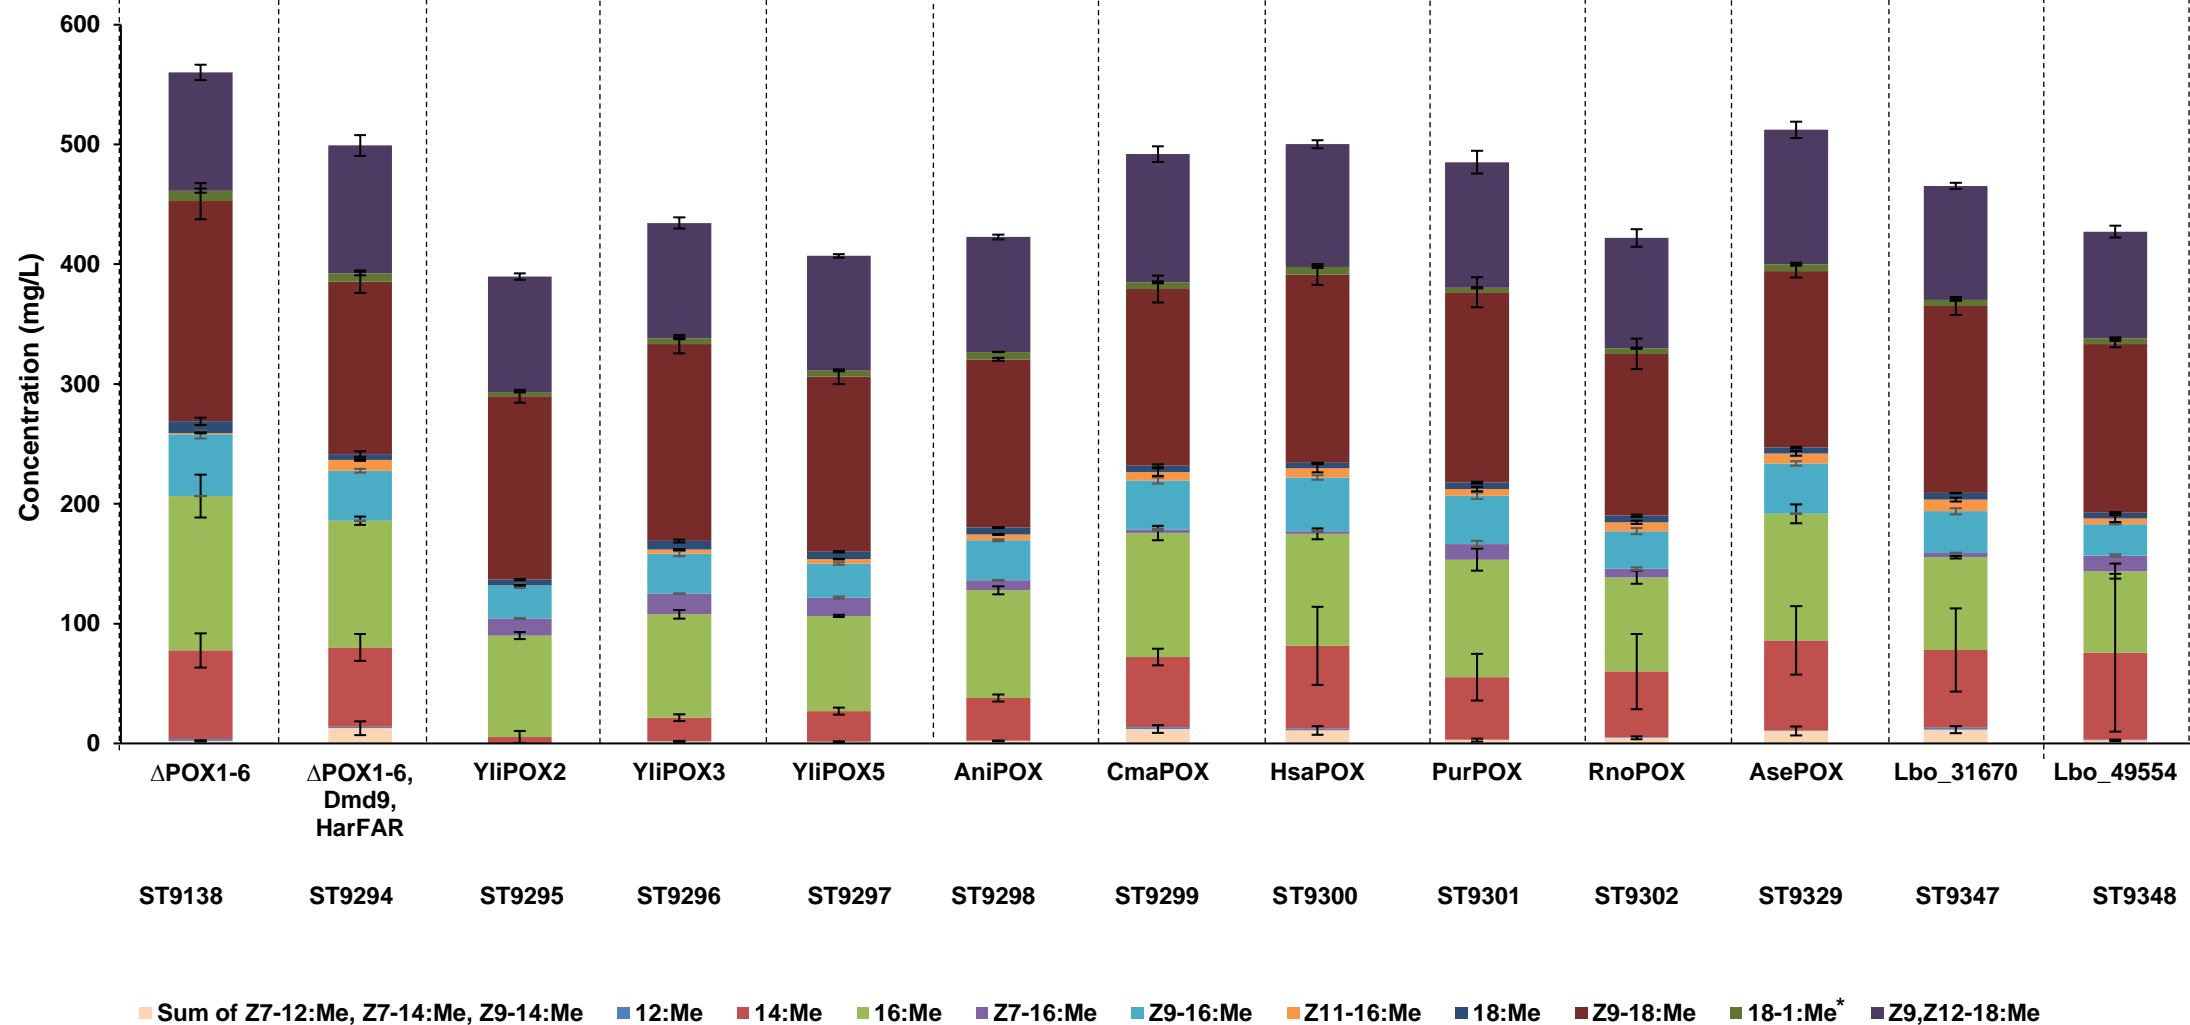

Figure S3. Fatty acid profiles in the form of methyl esters obtained from the *Y. lipolytica* strains containing Dmd9, HarFAR and different POXes. Cultivation media was supplemented with 0.24% (v/v) of 14:Me. \*: Position of double bond remains to be identified. Error bars represent standard deviations from three technical replicates

|                              |       |   |   |   |   |       |       |       |       |       |       |       |
|------------------------------|-------|---|---|---|---|-------|-------|-------|-------|-------|-------|-------|
| % of Z7-12:Me in total FAMES | 0     | 0 | 0 | 0 | 0 | 0     | 0     | 0     | 0     | 0     | 0.014 | 0     |
| % of Z9-12:Me in total FAMES | 0.037 | 0 | 0 | 0 | 0 | 0.037 | 0.090 | 0.010 | 0.029 | 0.081 | 0.126 | 0.011 |
| % of Z7-14:Me in total FAMES | 0     | 0 | 0 | 0 | 0 | 0.006 | 0.006 | 0.005 | 0.015 | 0     | 0.010 | 0.014 |

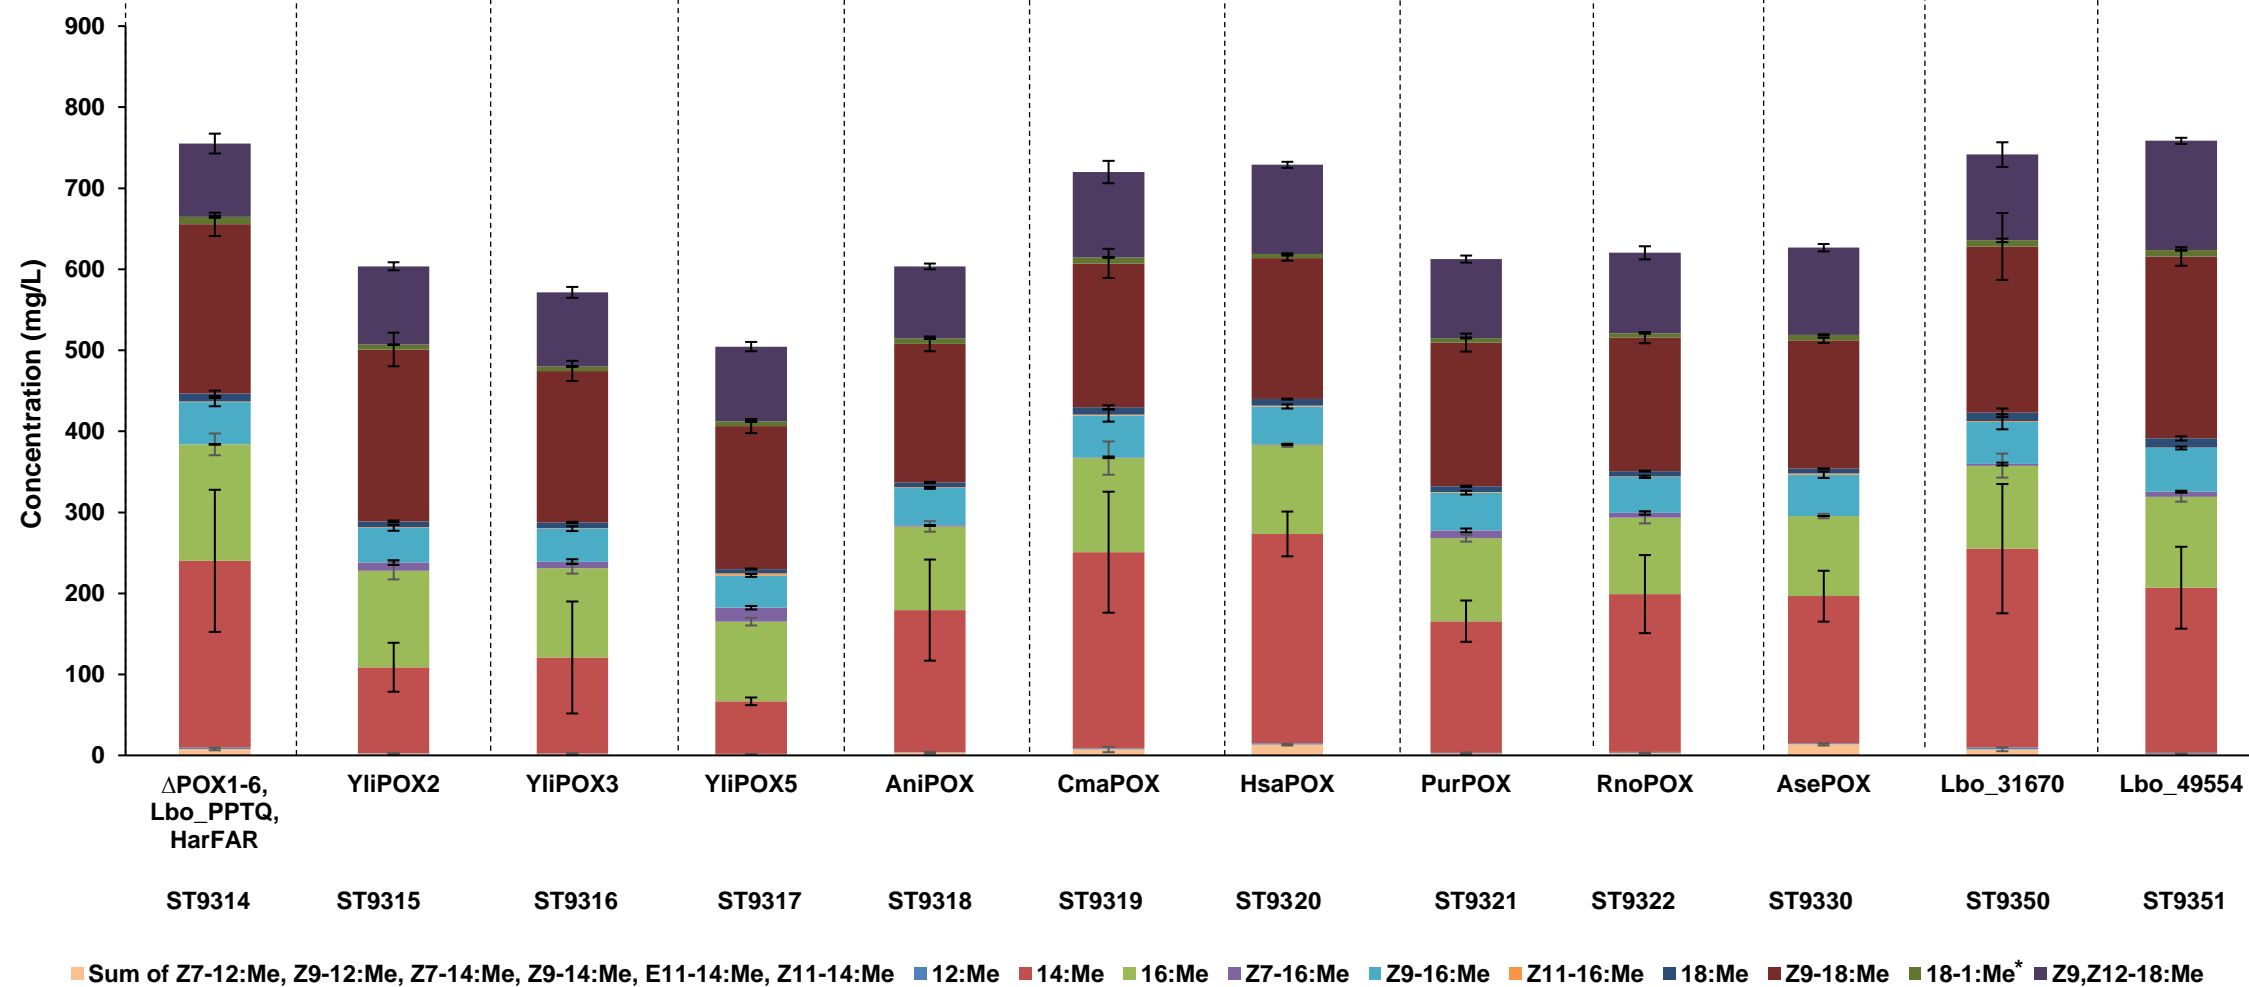

Figure S4. Fatty acid profiles in the form of methyl esters obtained from the *Y. lipolytica* strains containing Lbo\_PPTQ, HarFAR and different POXes. Cultivation media was supplemented with 0.24% (v/v) of 14:Me. \*: Position of double bond remains to be identified. Error bars represent standard deviations from three technical replicates



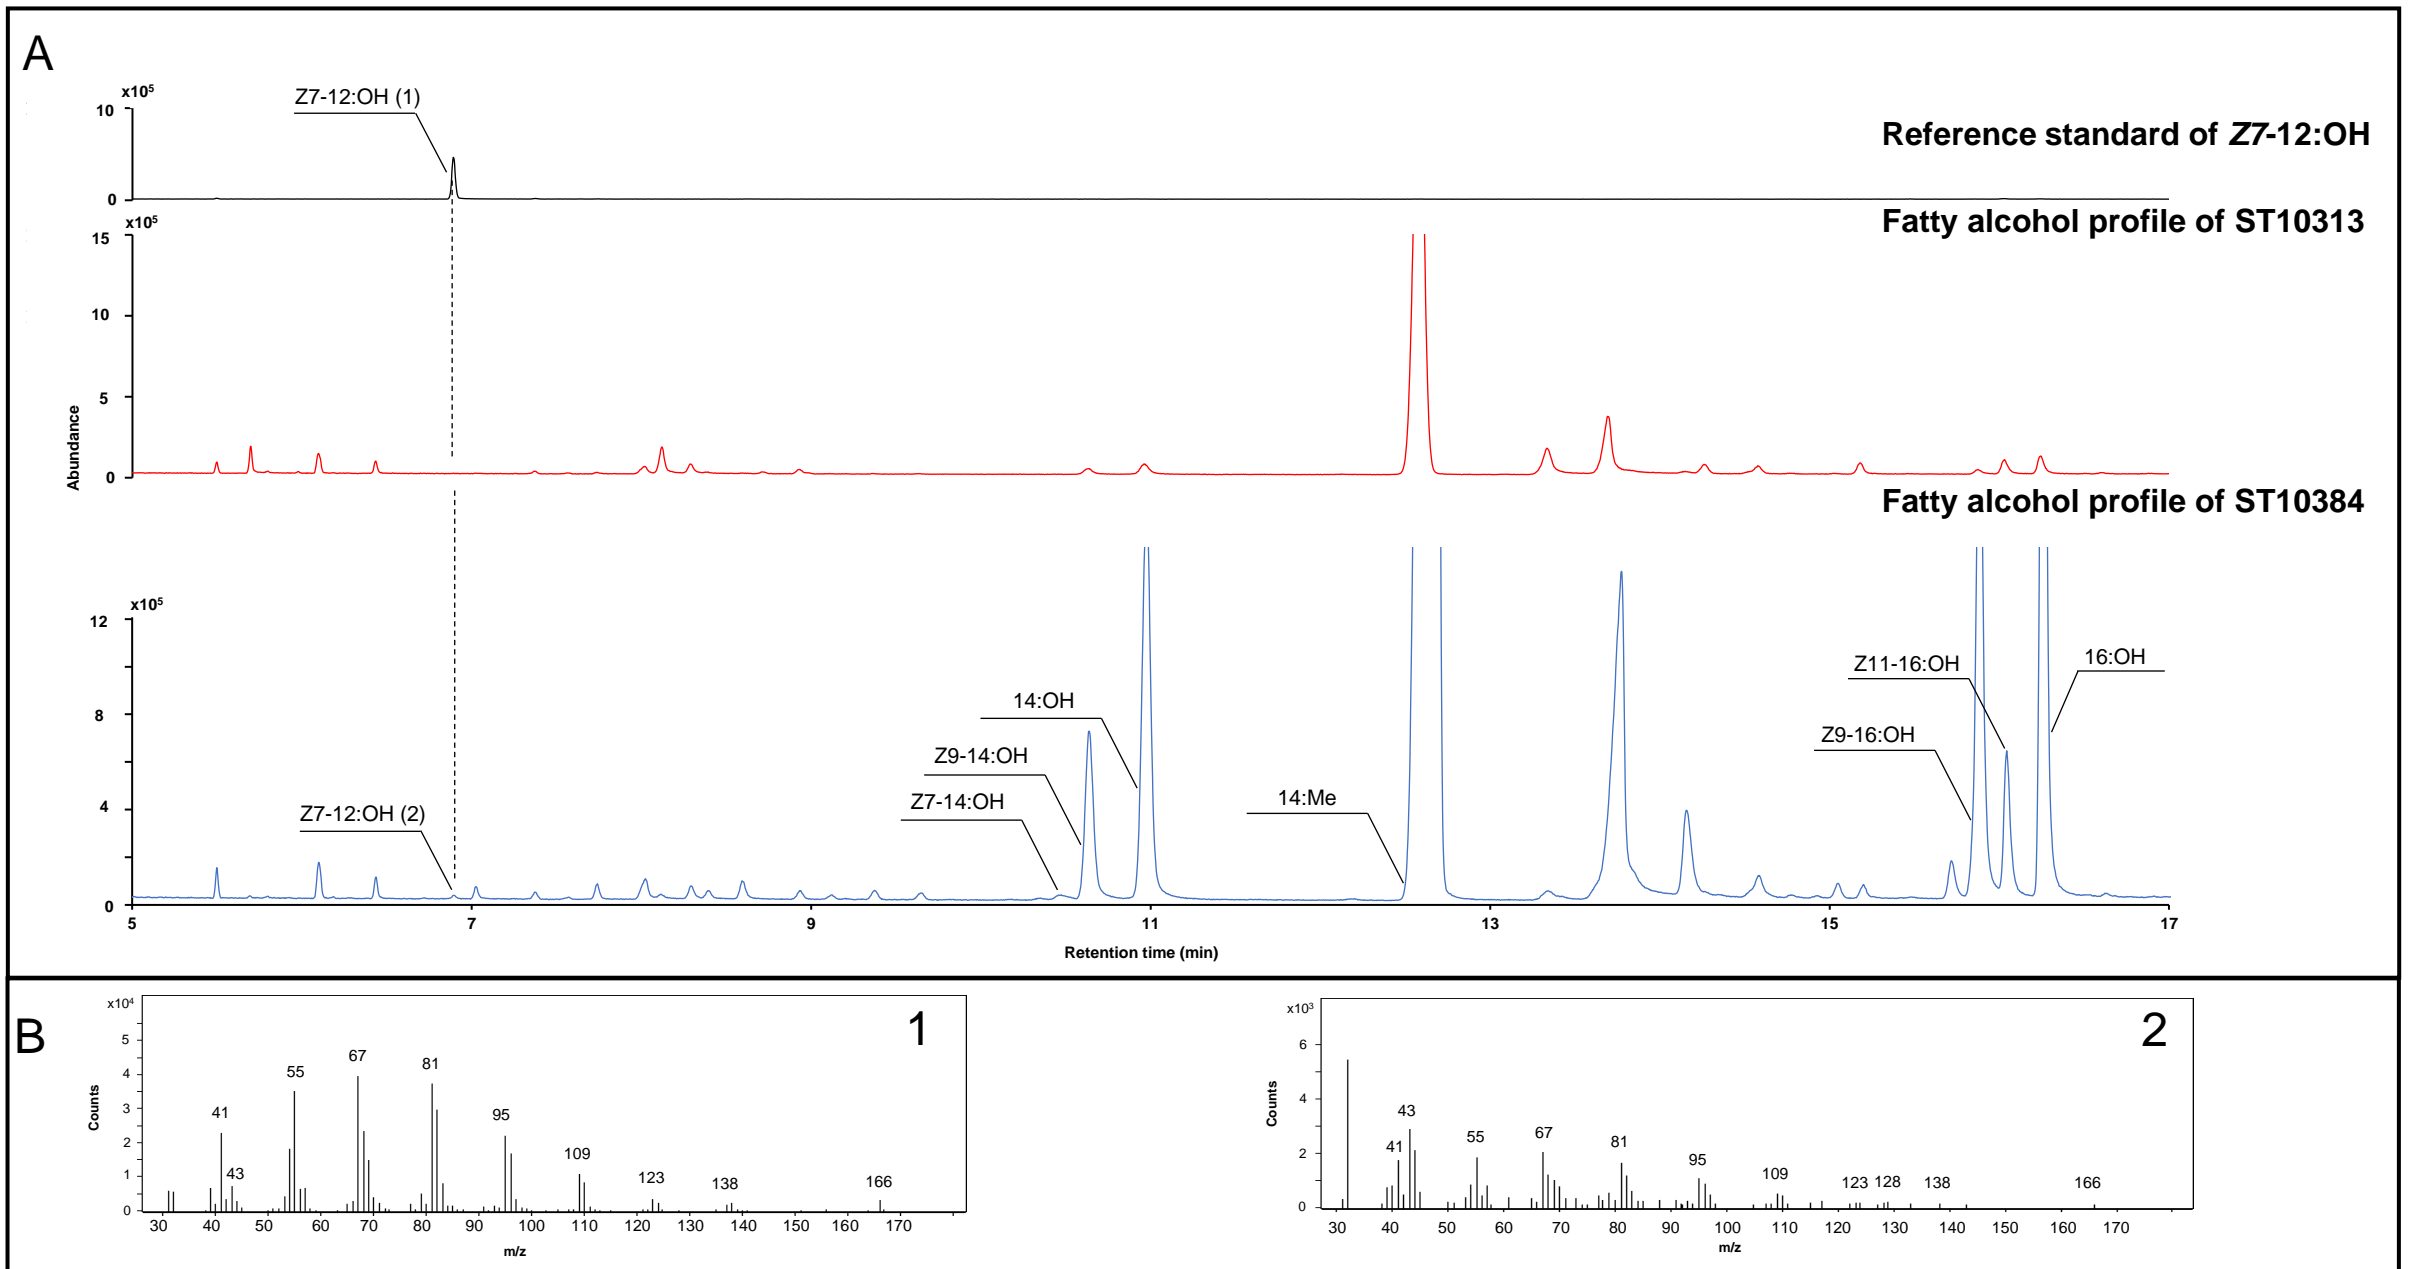

Figure S5.A. GC-MS chromatograms of Z7-12:OH reference standard and fatty alcohol profiles of ST10313 (red) and ST10384 (blue). B. Mass spectra of Z7-12:OH reference standard (1) and biologically produced Z7-12:OH (2). Cultivation media was supplemented with 0.4% (v/v) of 14:Me.

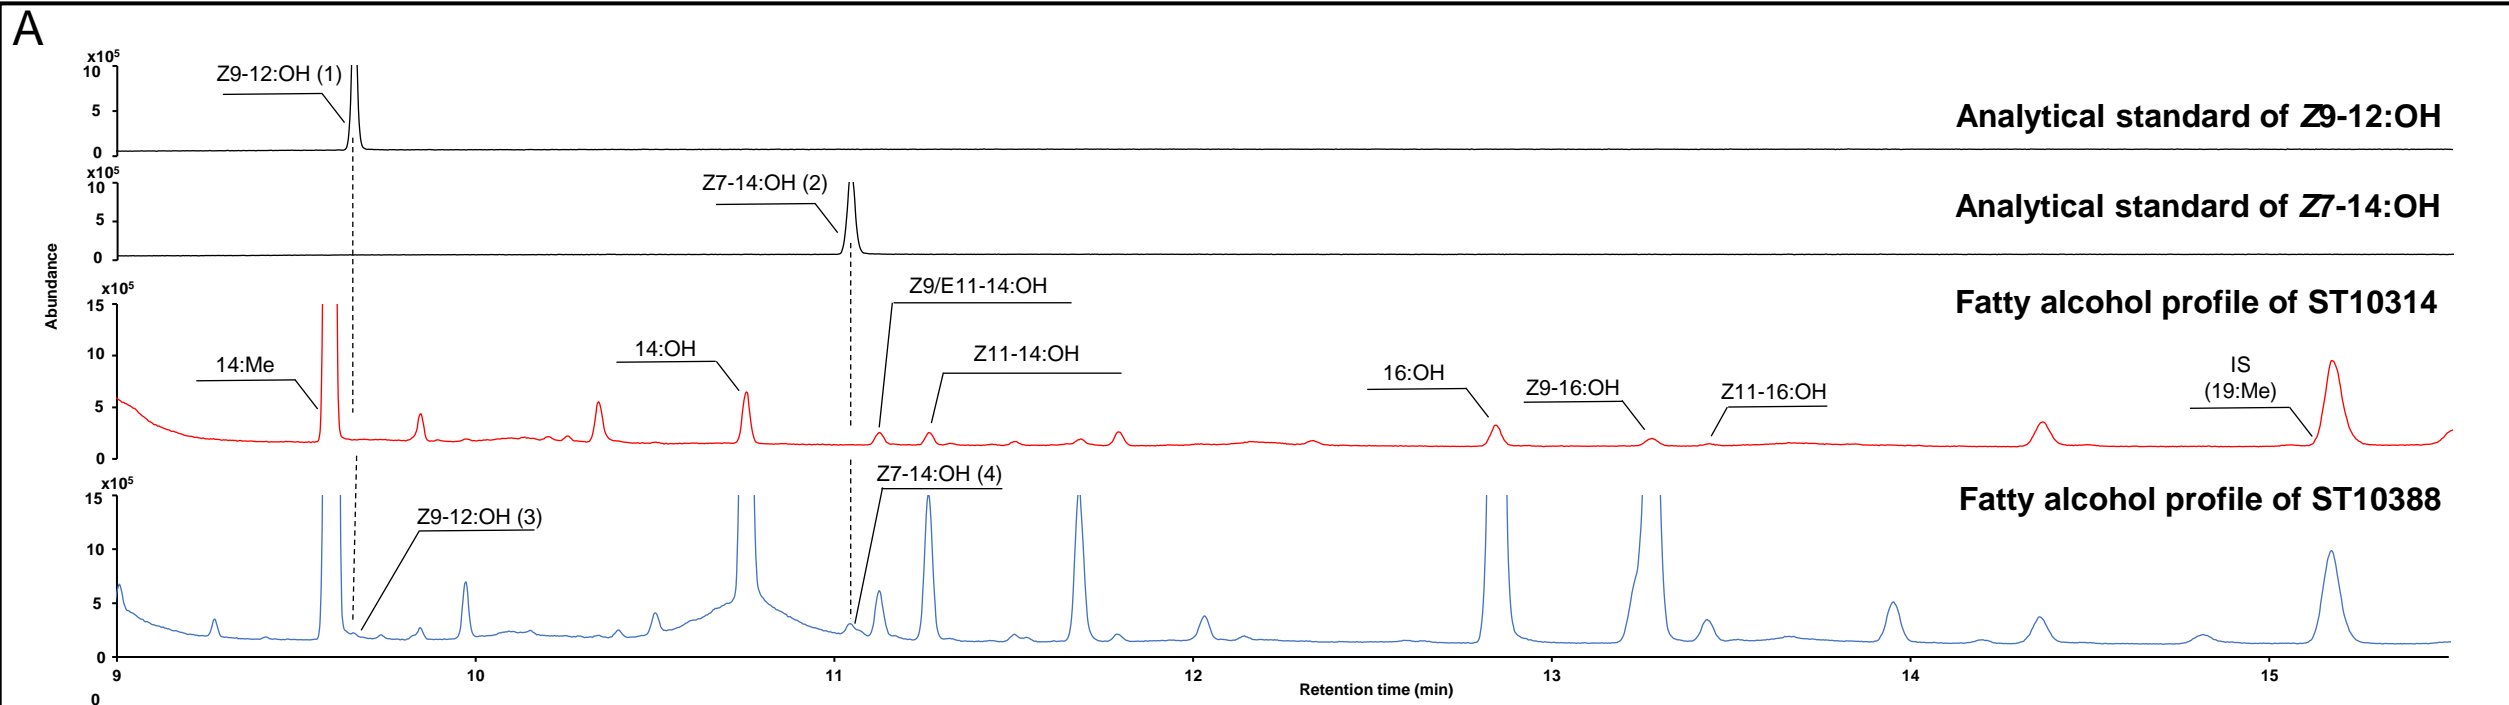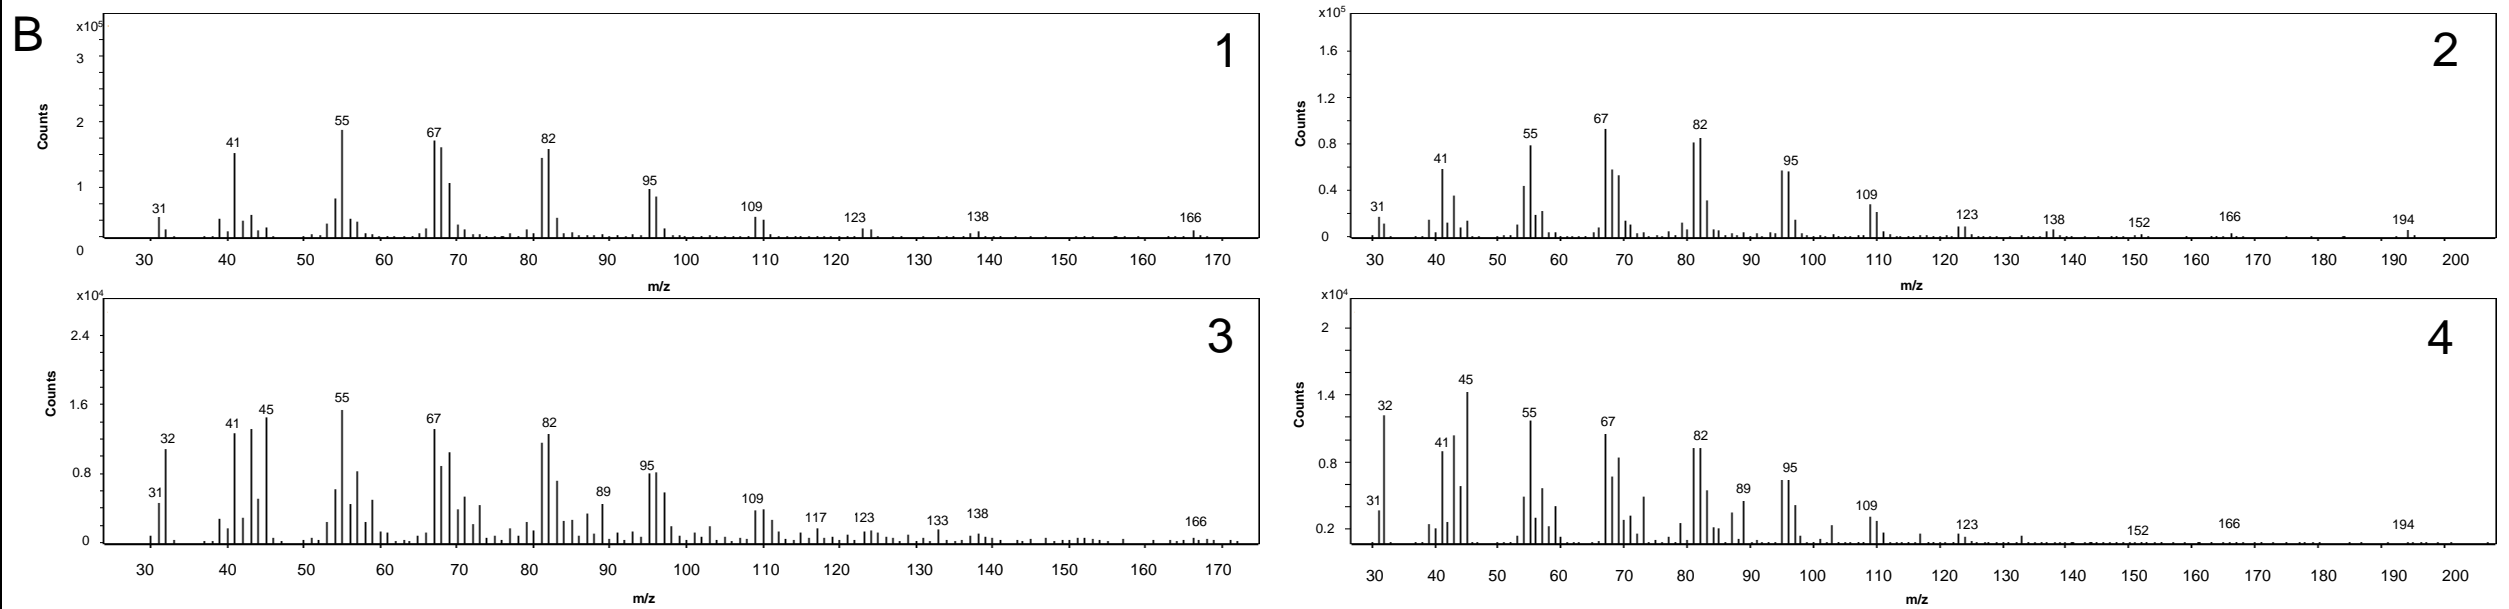

Figure S6.A. GC-MS chromatograms of Z9-12:OH and Z7-14:OH reference standards together with fatty alcohol profiles of ST10314 (red) and ST10388 (blue). B. Mass spectra of Z9-12:OH reference standard (1) and Z7-14:OH reference standard together with mass spectra of biologically produced Z9-12:OH (3) and Z7-14:OH (4). Cultivation media was supplemented with 0.4% (v/v) of 14:Me.

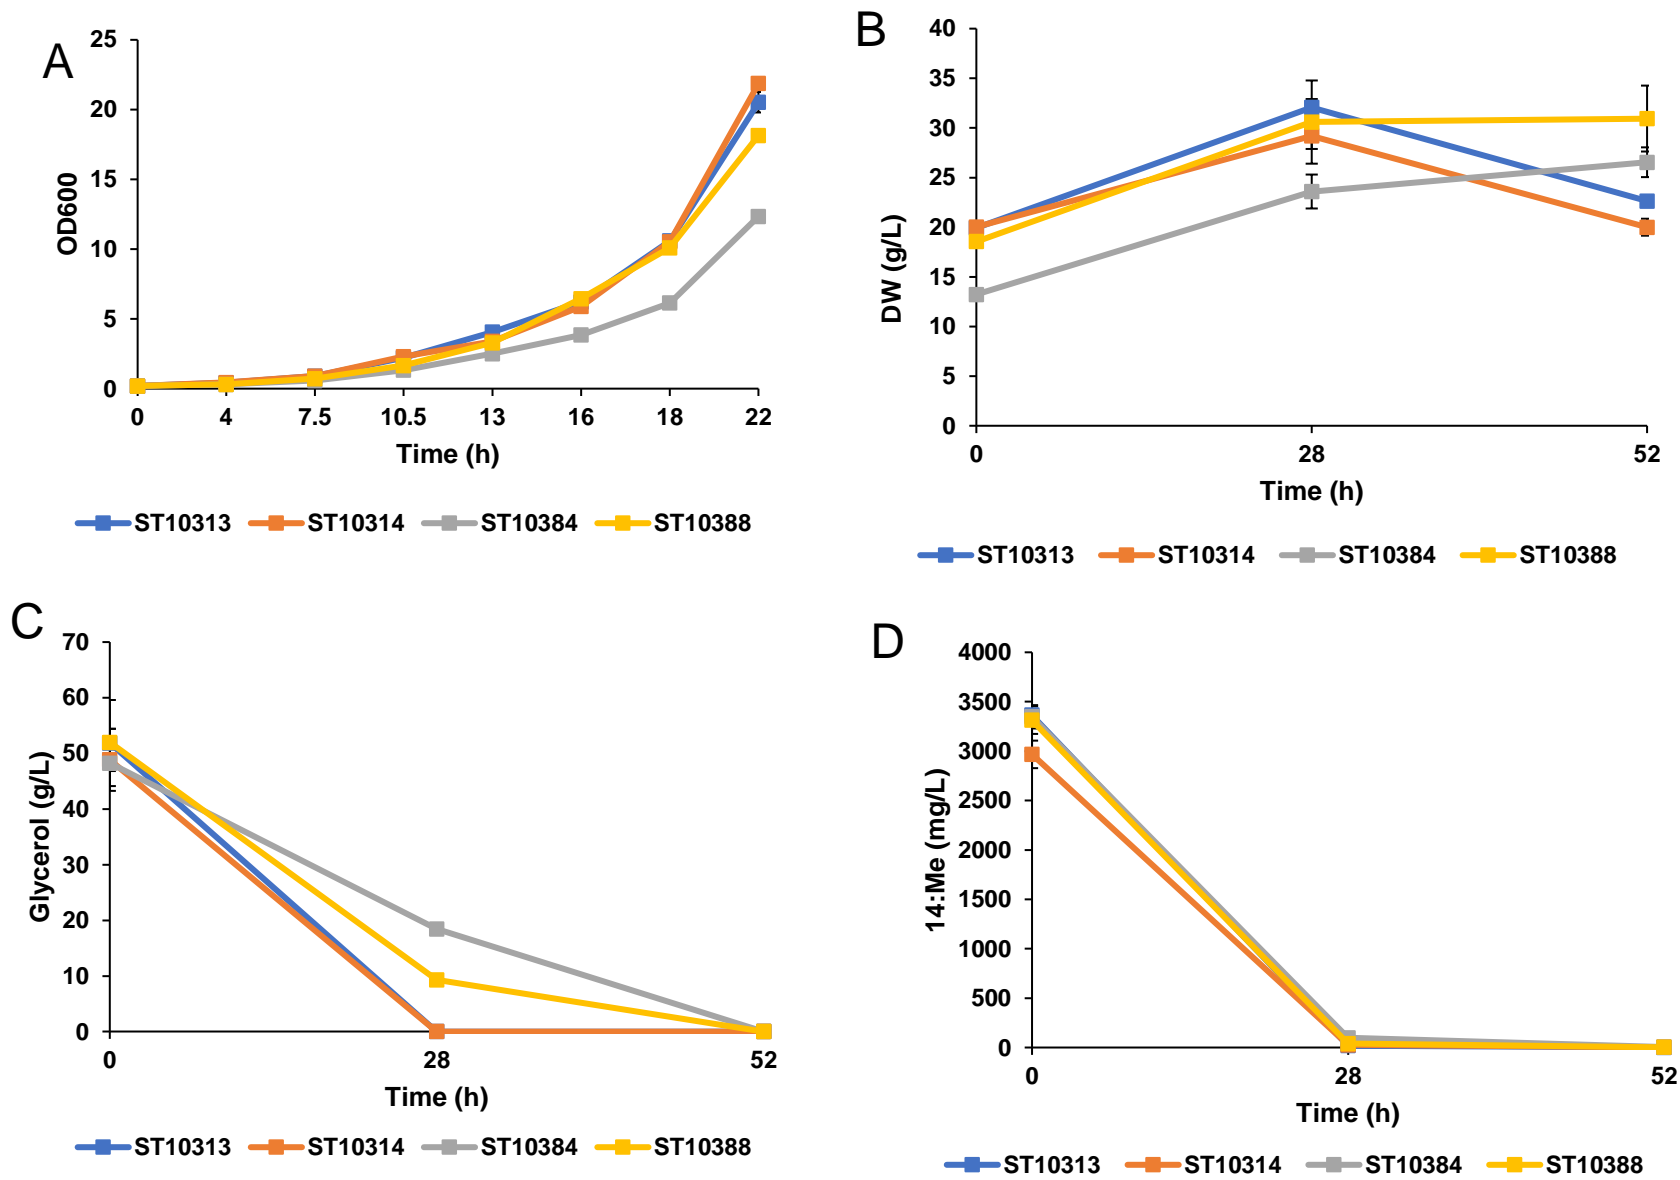

Figure S7. Growth characteristics and utilization of glycerol and 14:Me by *Y. lipolytica* strains ST10313, ST10314, ST10384, ST10388 in shake flasks. A. Growth curves during the first 22h in YPG media. B. Dry weight (DW) measurements at 0, 28 and 52h after media exchange. C. Glycerol measurements at 0, 28 and 52h after media exchange. D. 14:Me measurements at 0, 28 and 52h after media exchange. Error bars represent standard deviations. OD measurements were performed in technical duplicates. DW, glycerol and 14:Me measurements were performed in technical triplicates.

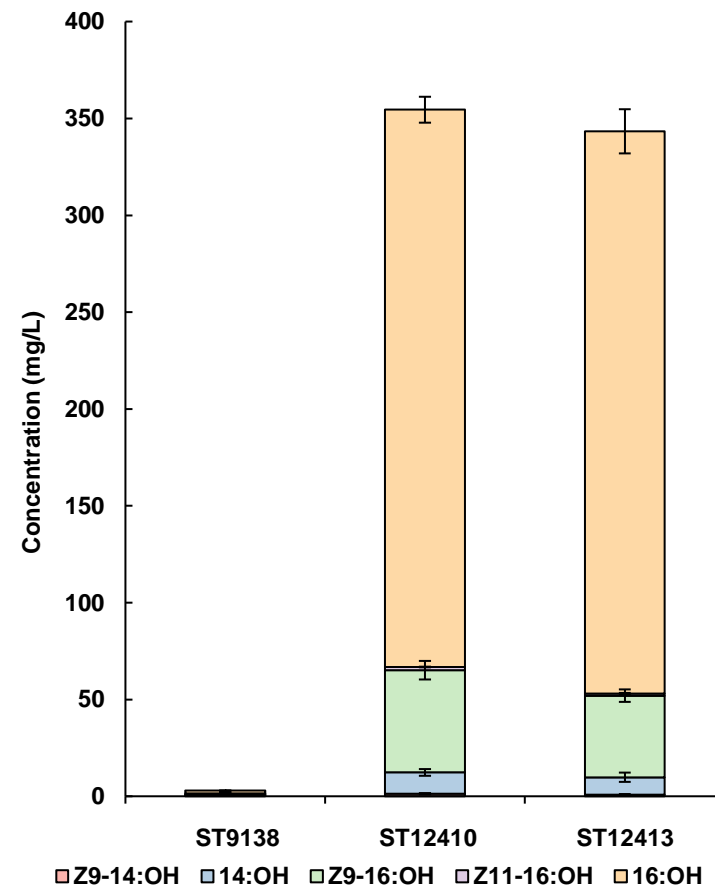

Figure S8. Fatty alcohol profiles of the *Y. lipolytica* strains expressing HarFAR-hrGFP-Per2 (ST12410) and HarFAR-hrGFP (ST12413) fusion proteins. ST9138 is the strain that does not have FAR. Error bars represent standard deviations from three technical replicates
